# Supplementary material for: Nitroaldol (Henry) reaction of 2-oxoaldehydes with nitroalkanes as a strategic step for a useful, one-pot synthesis of 1,2-diketones
Source: Royal Society of Chemistry journal article supplement (doi:10.1039/c5ra03772g), 2015-01-01

<sup>1</sup>H NMR - Compound 5aa.

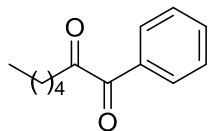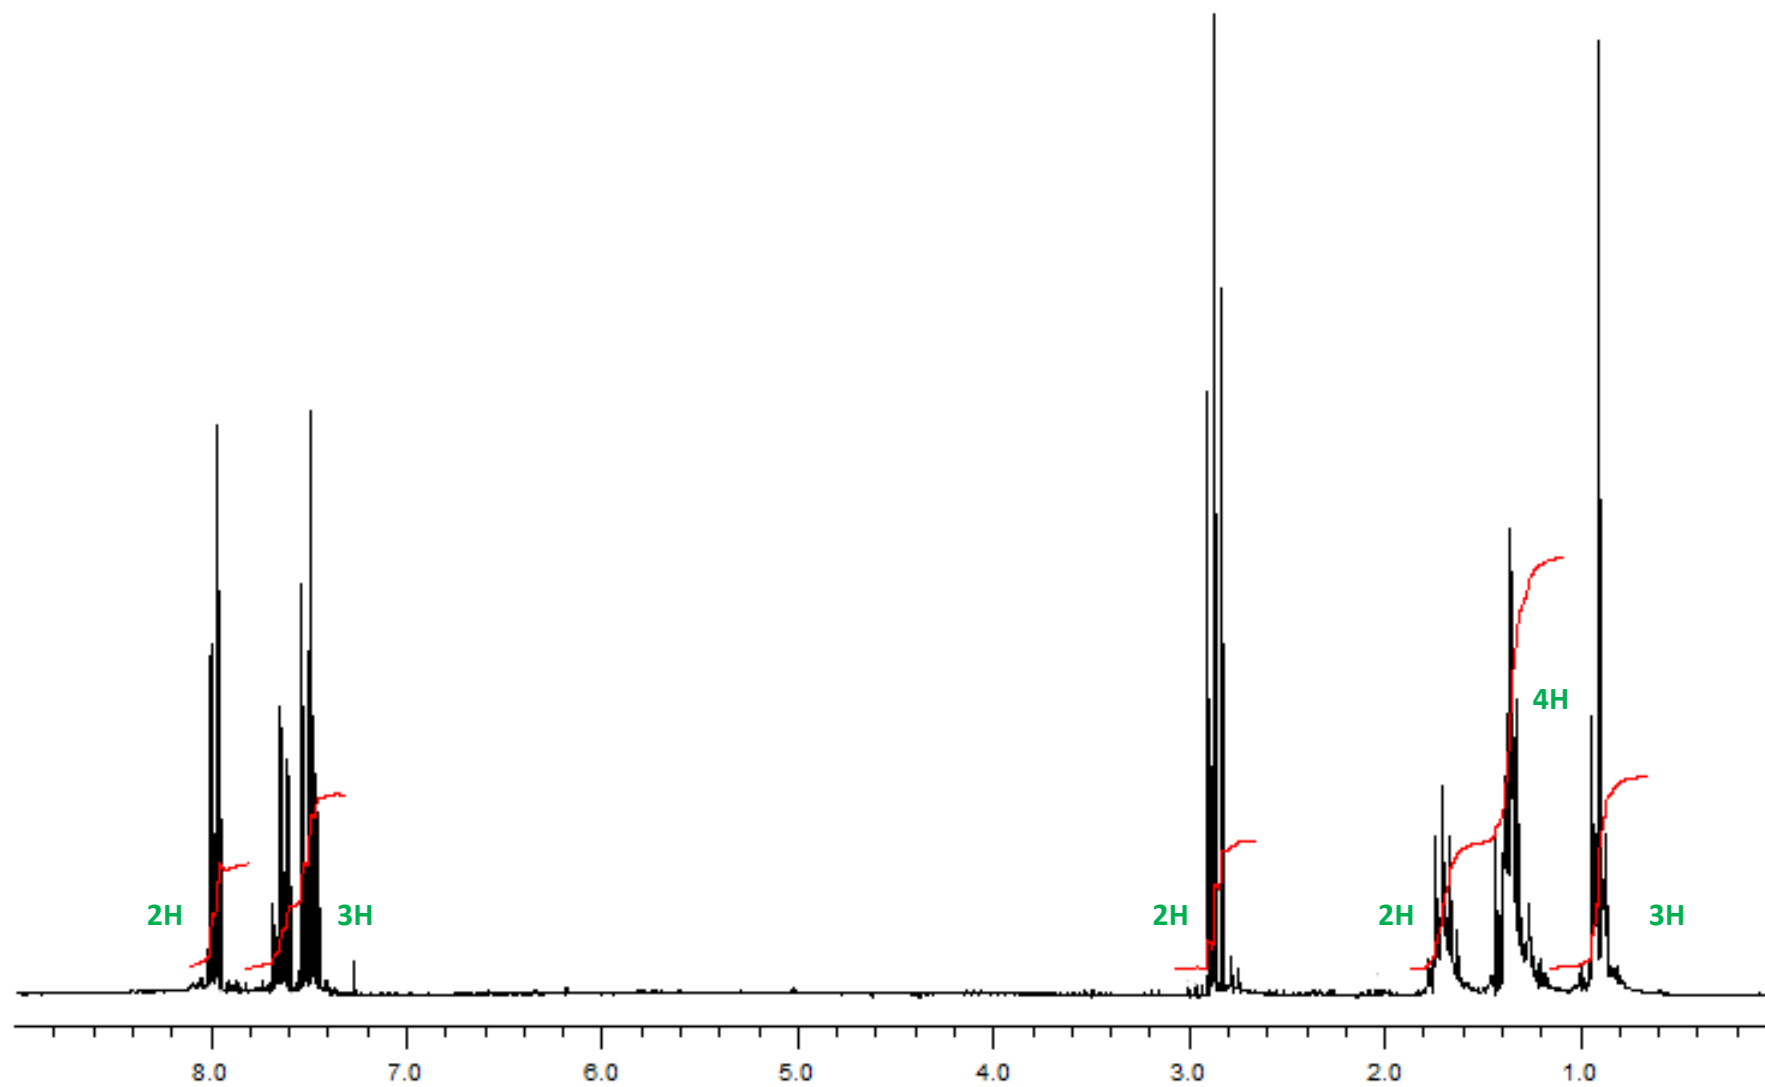

$^{13}\text{C}$  NMR - Compound **5aa**.

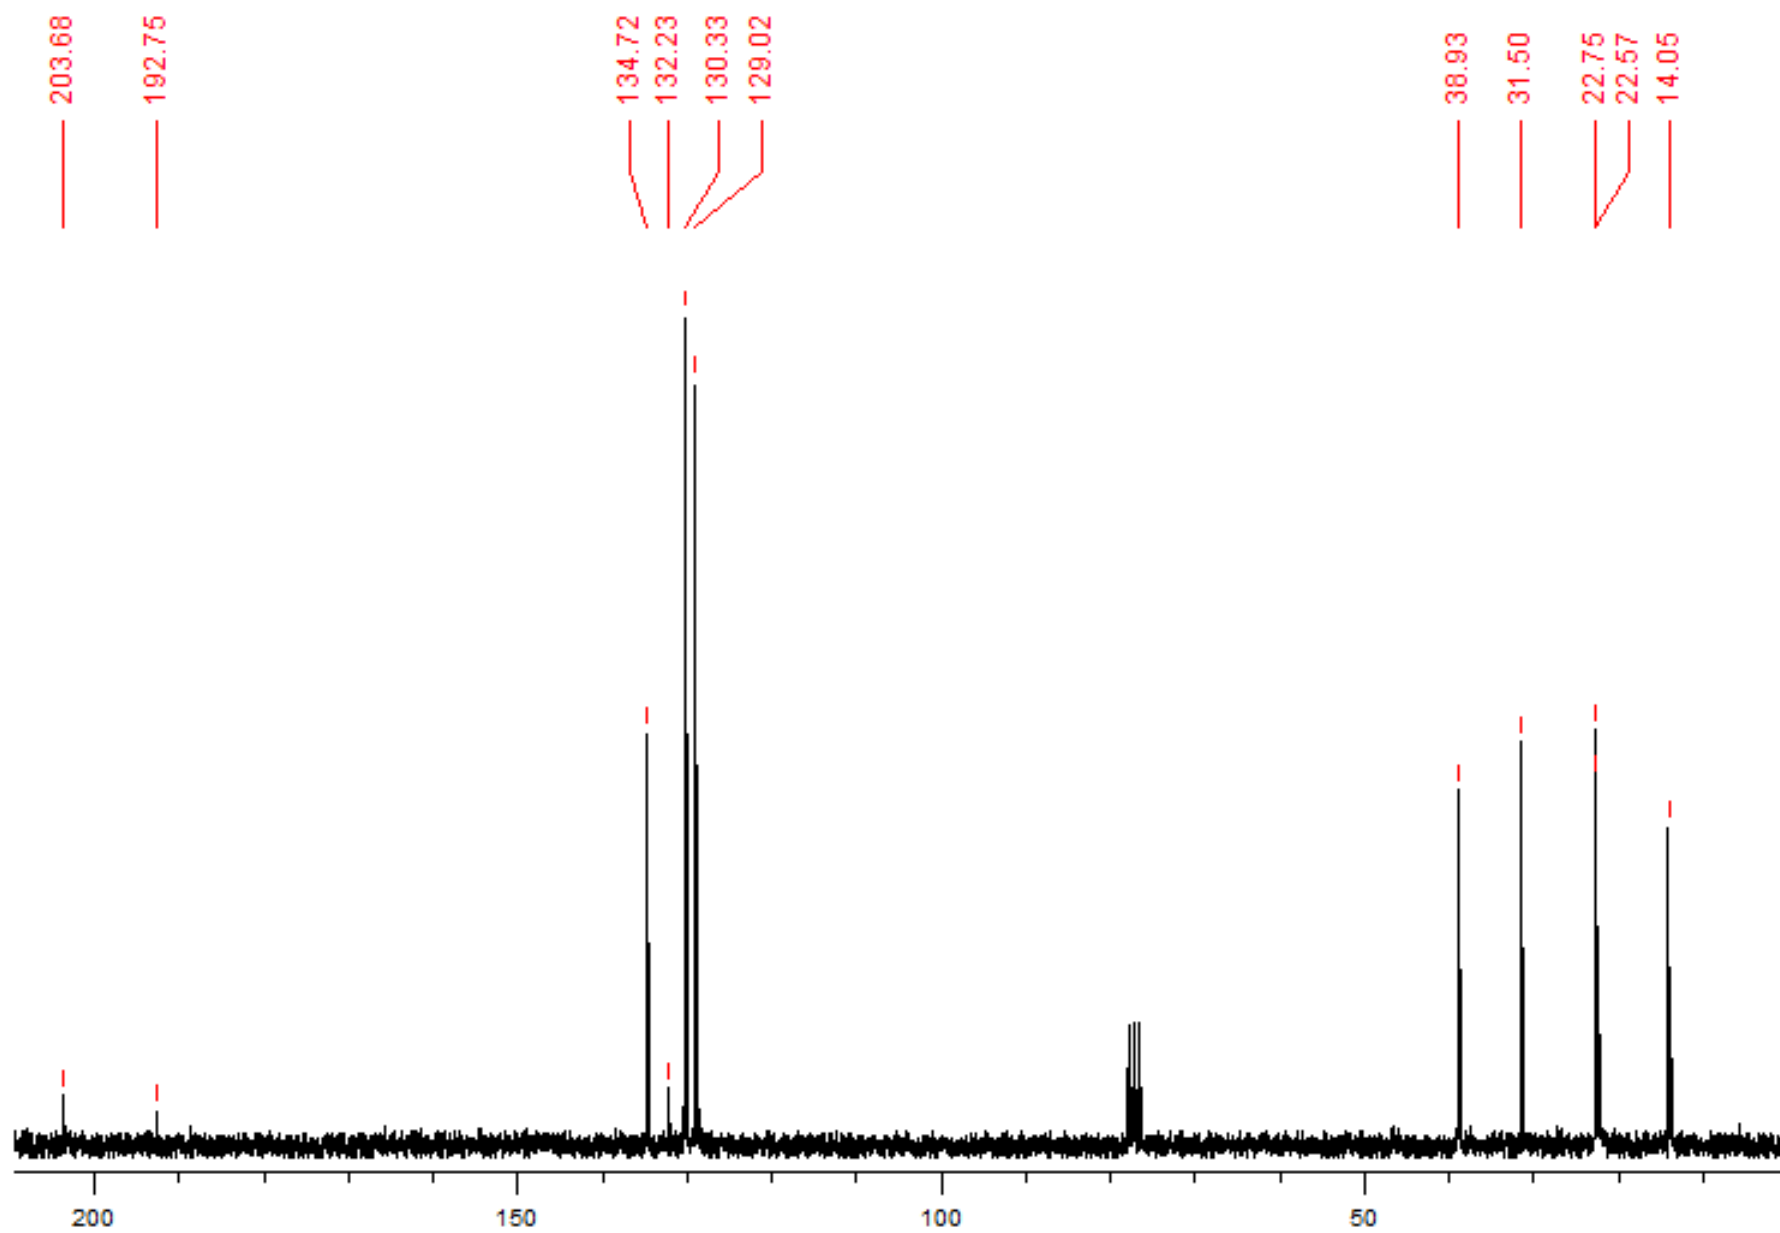

<sup>1</sup>H NMR - Compound **5ba**.

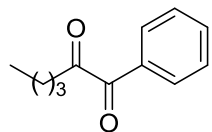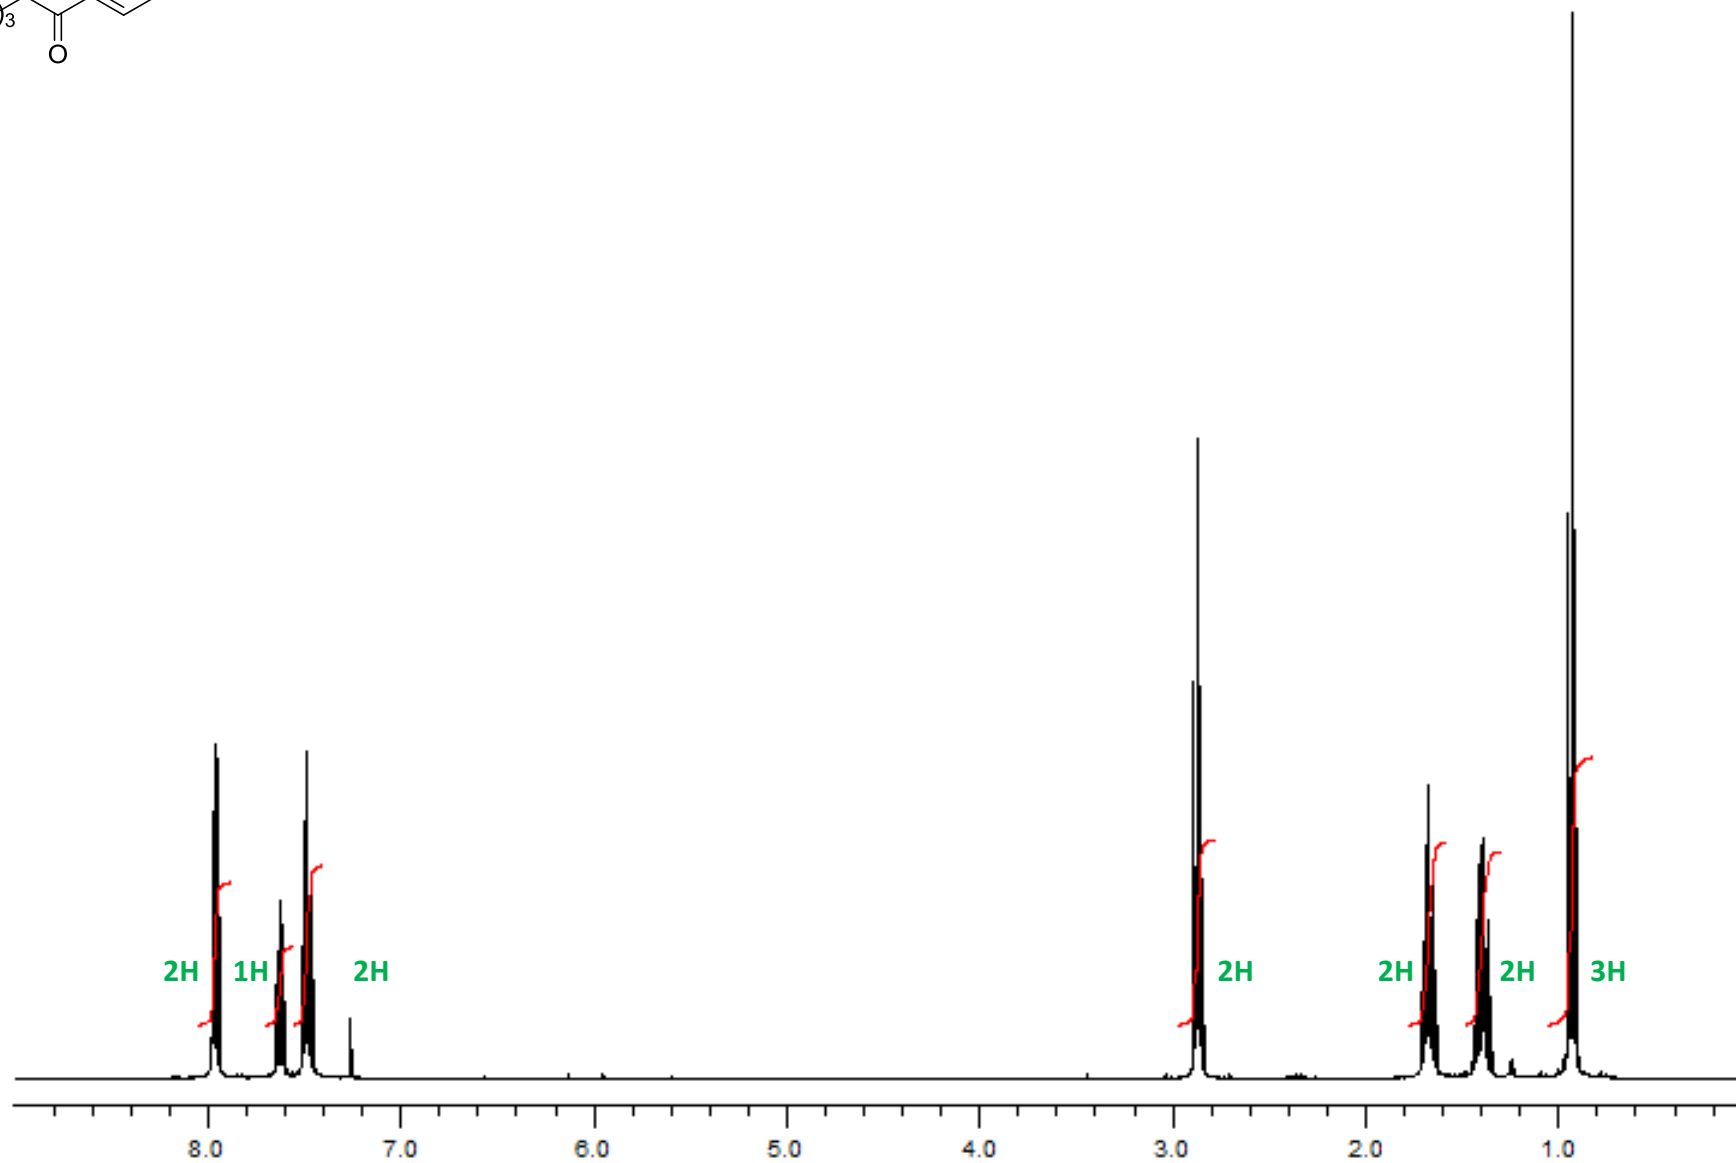

<sup>13</sup>C NMR - Compound **5ba**.

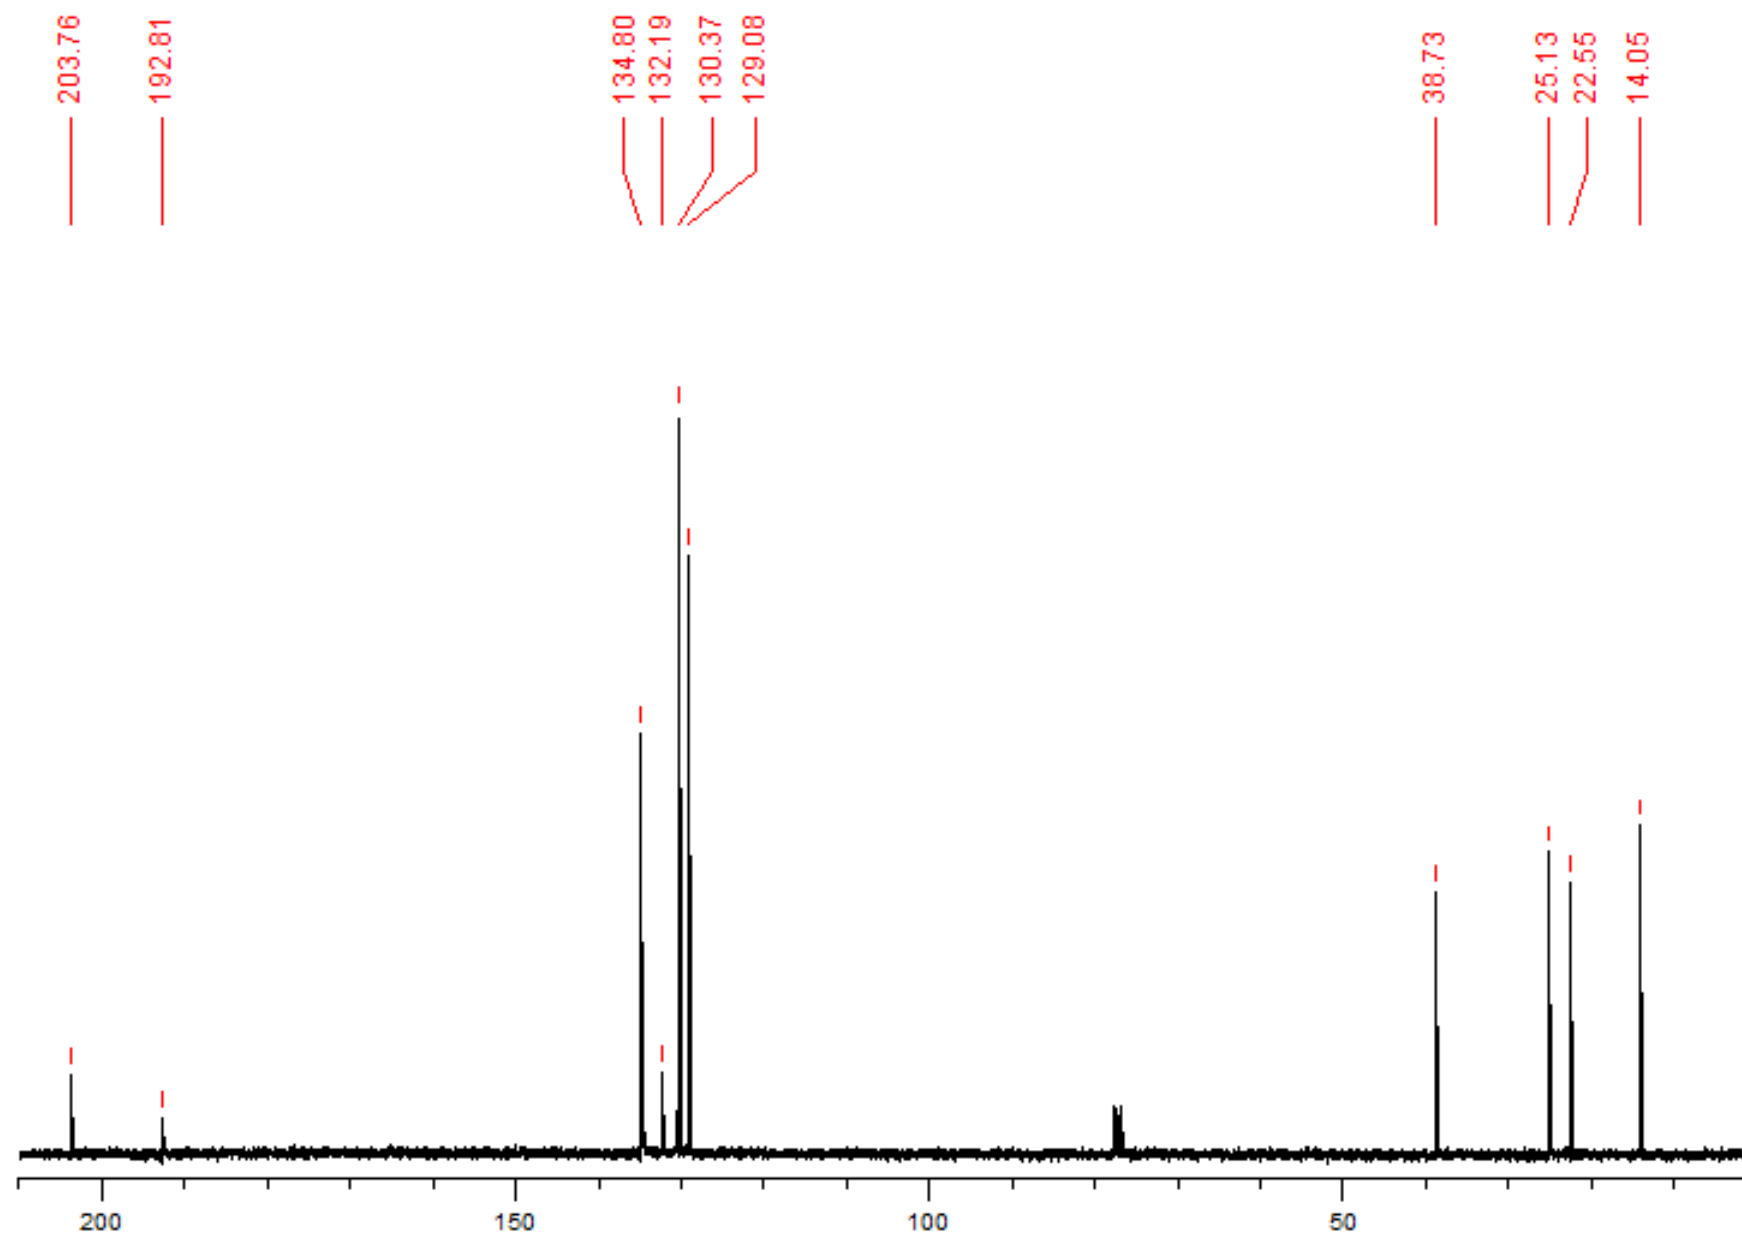

<sup>1</sup>H NMR - Compound **5ca**.

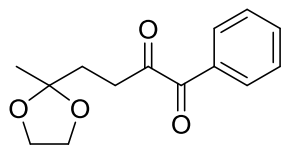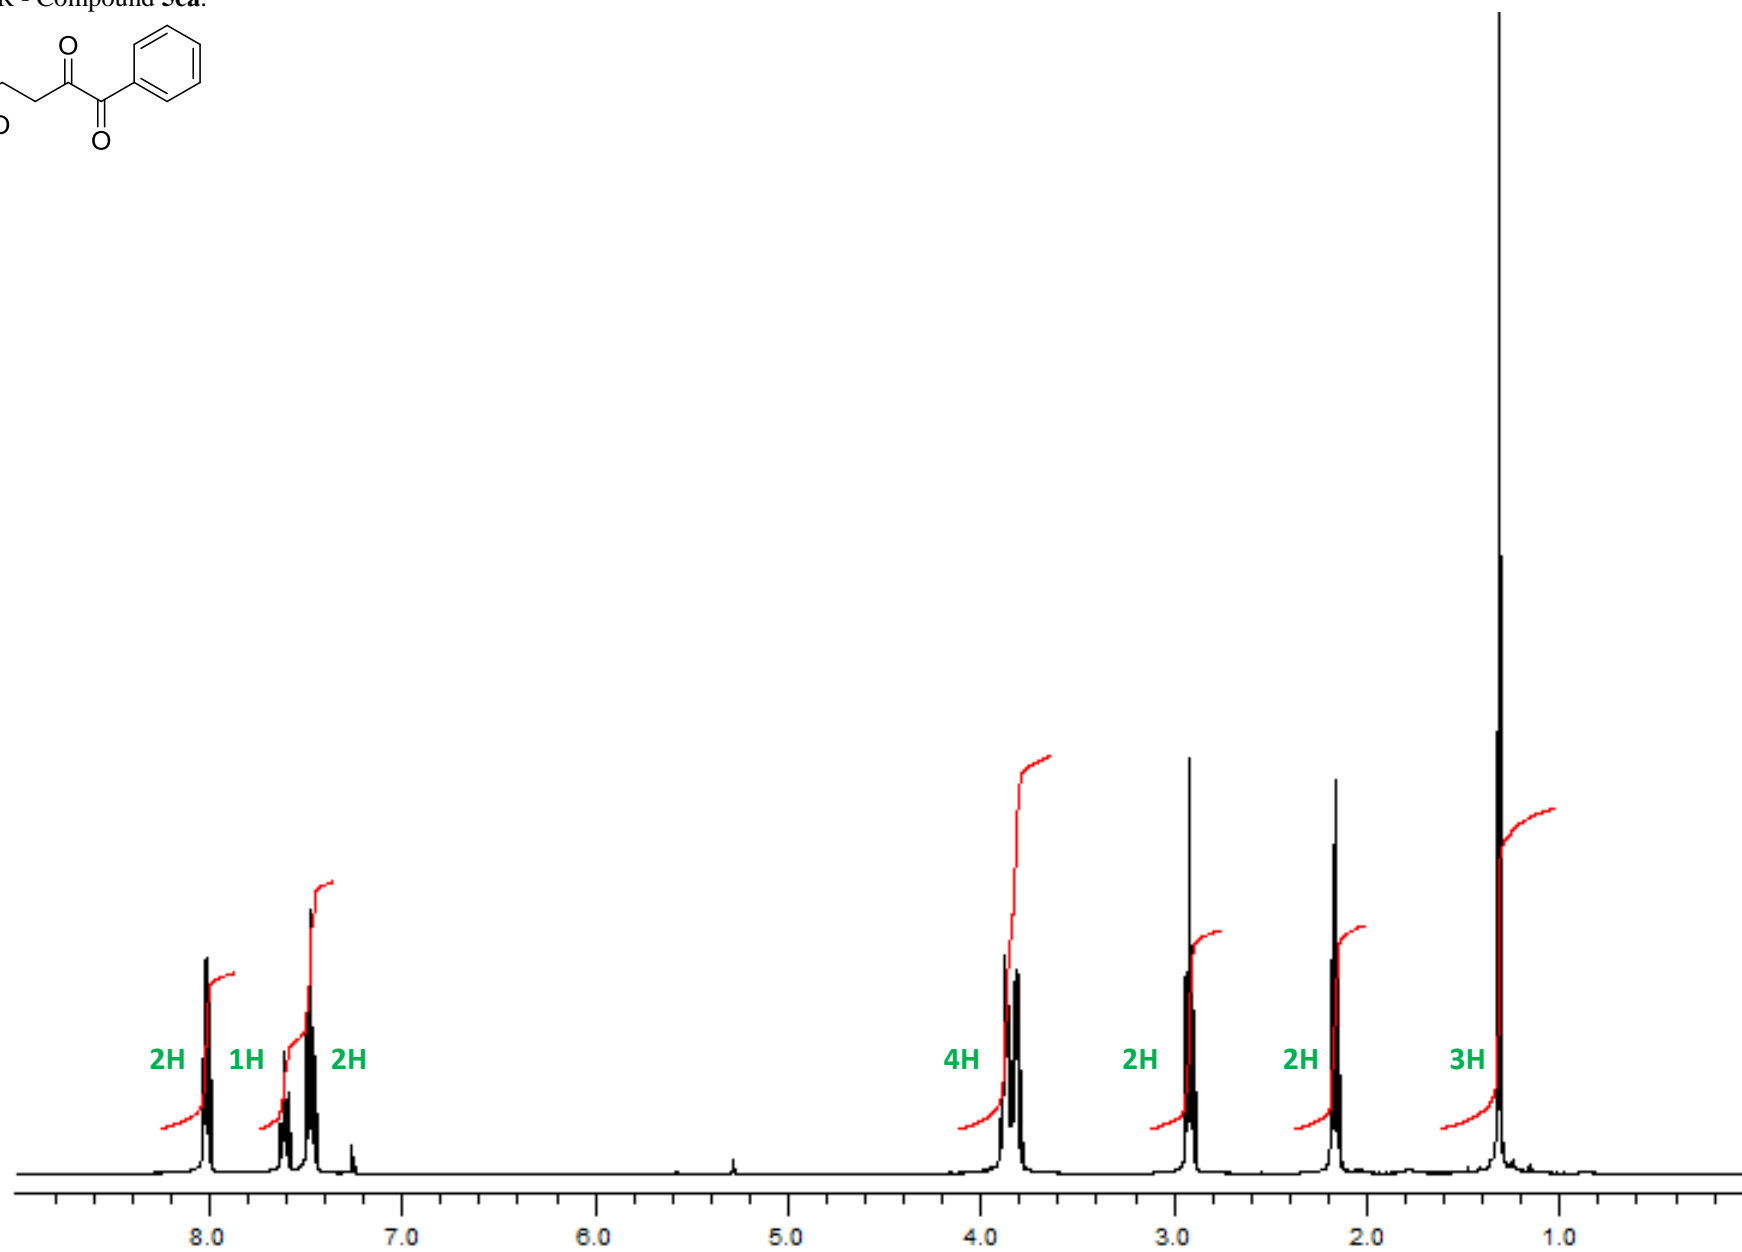

<sup>13</sup>C NMR - Compound 5ca.

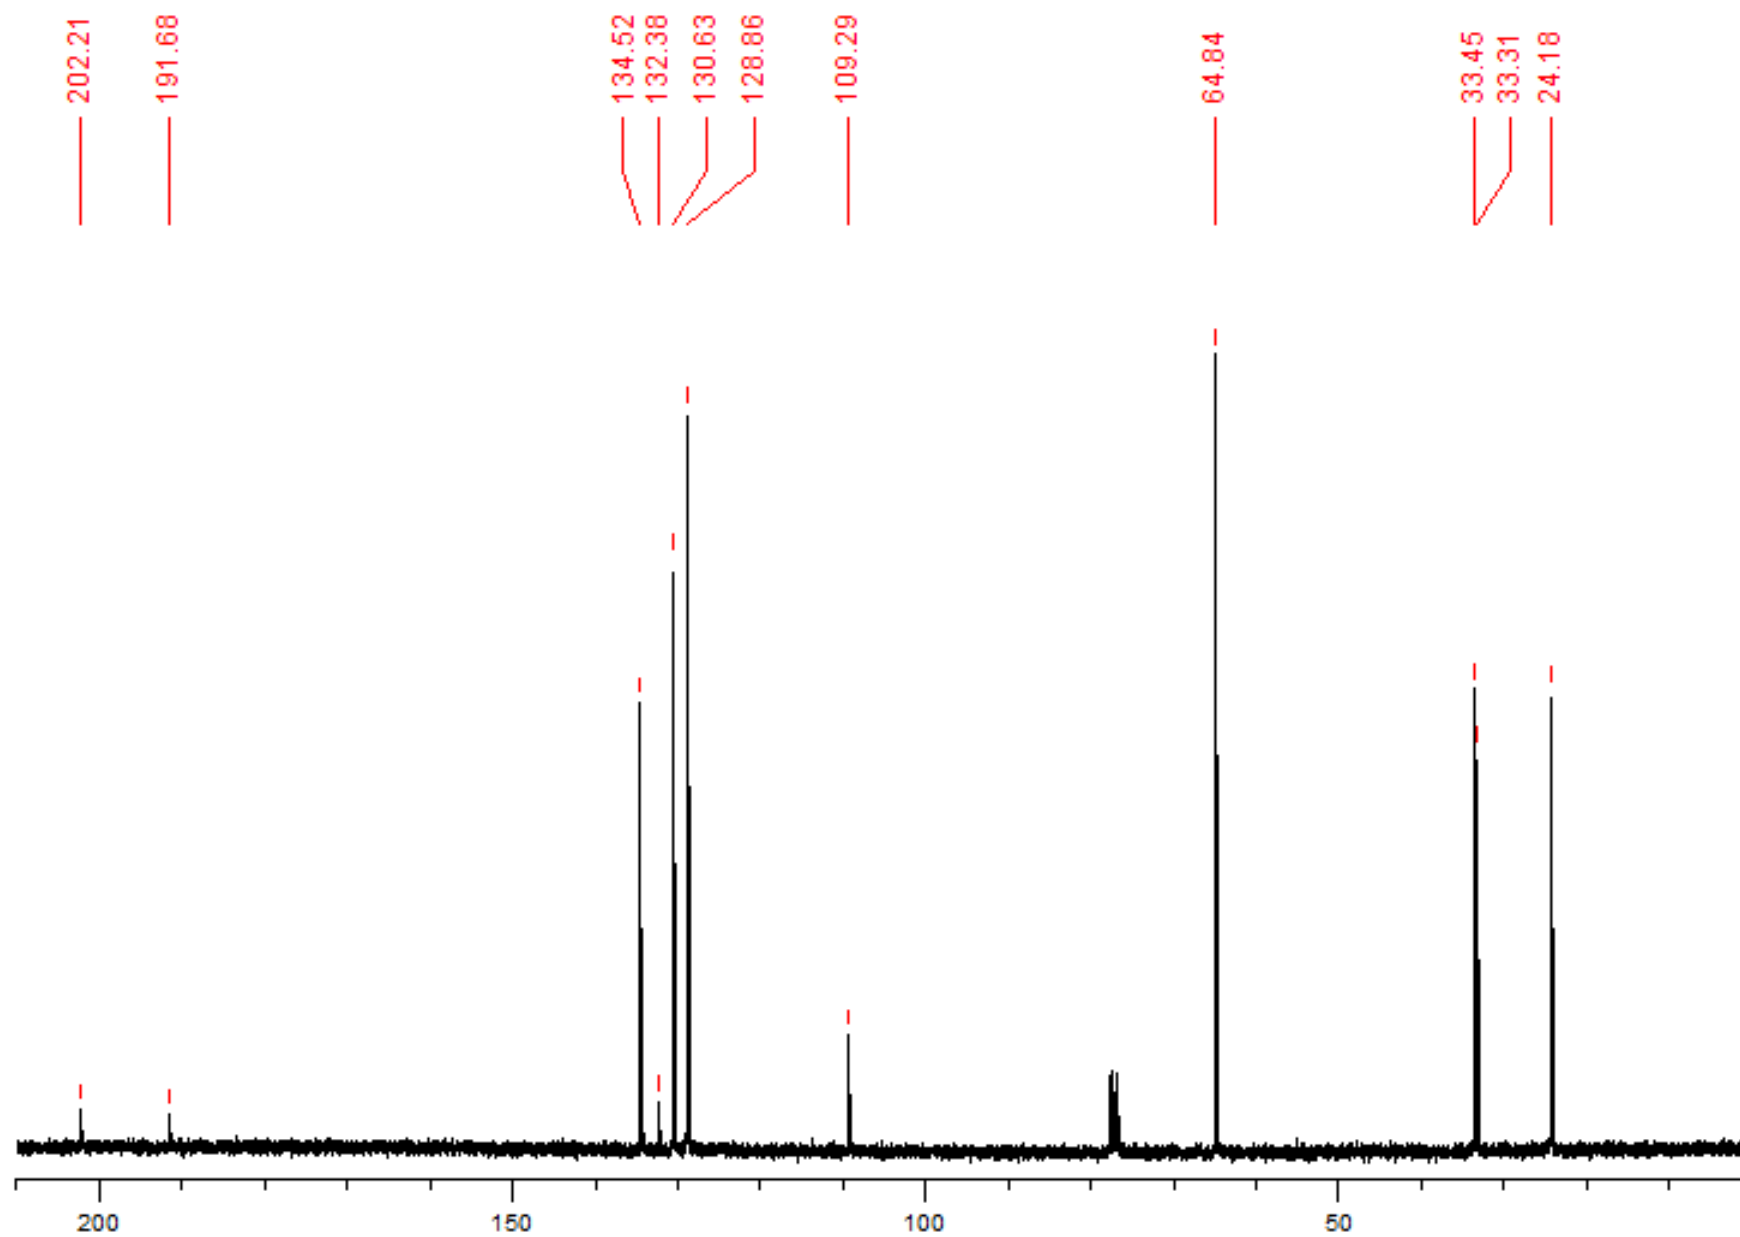

<sup>1</sup>H NMR - Compound **5da**.

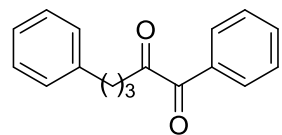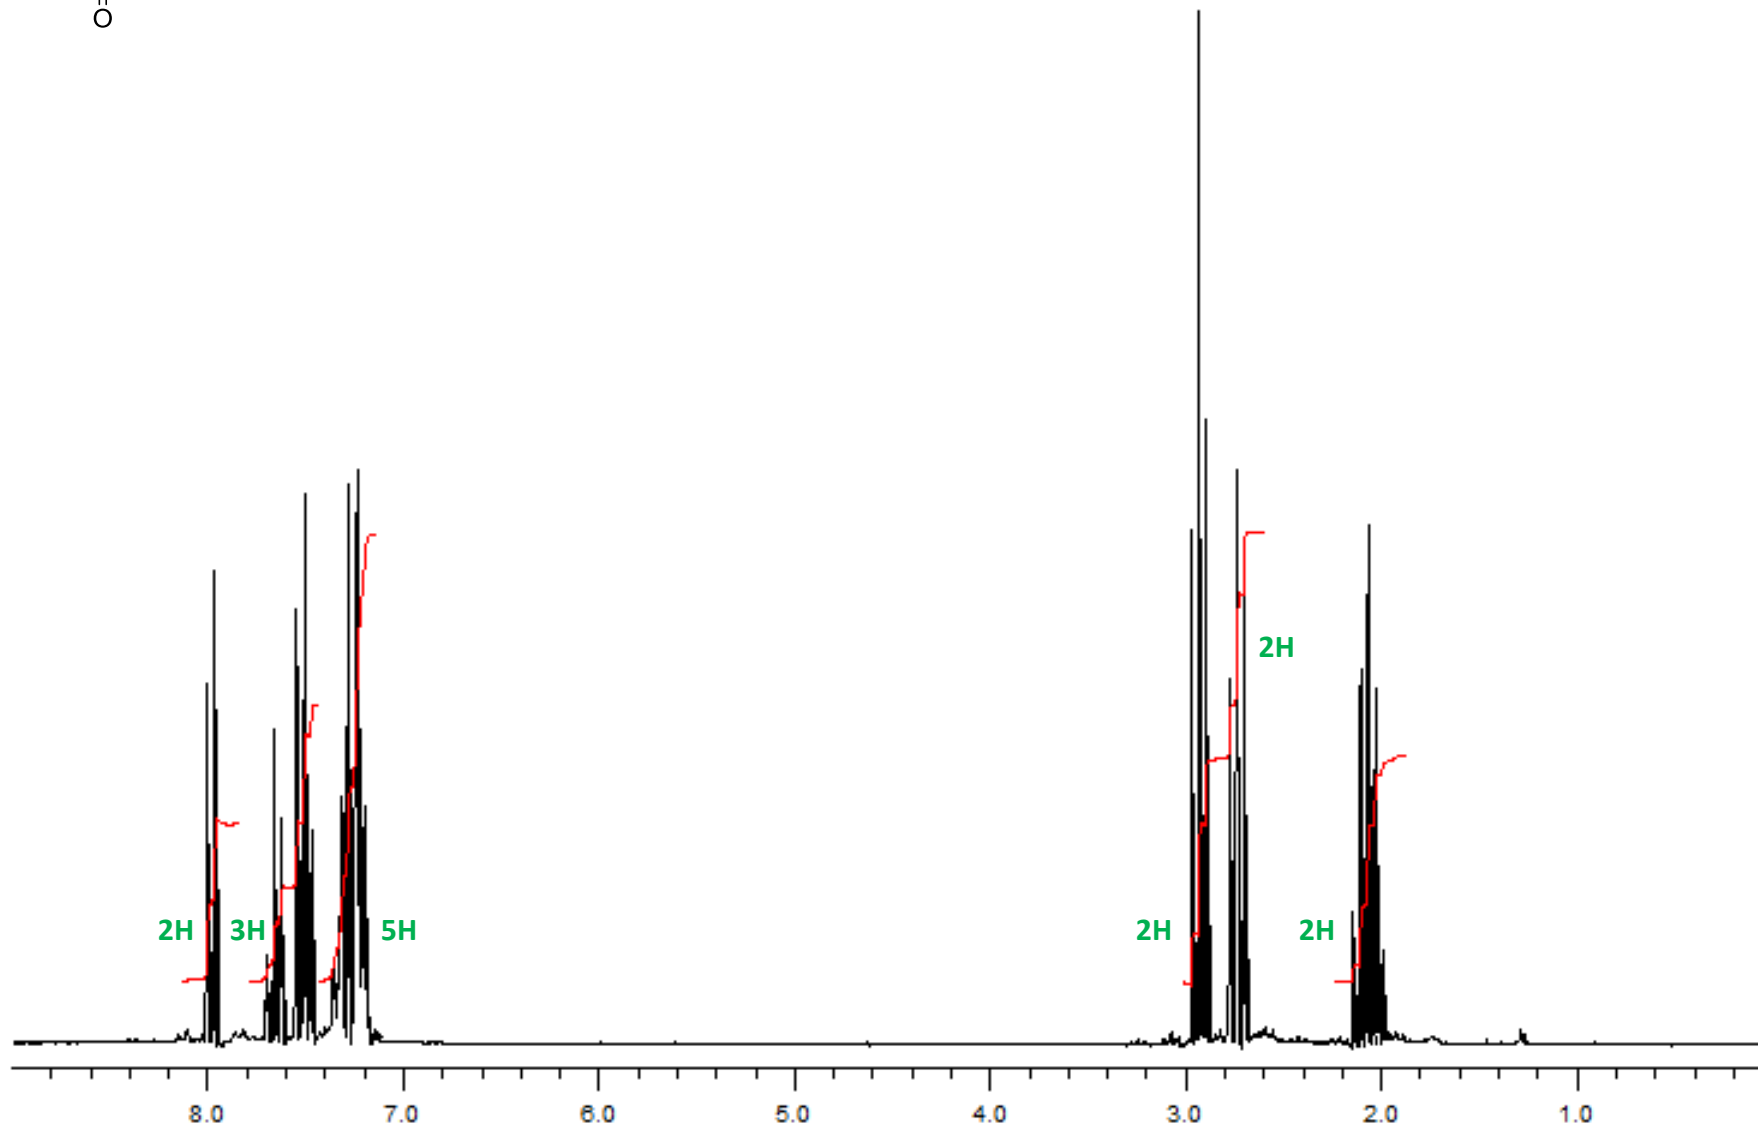

$^{13}\text{C}$  NMR - Compound **5da**.

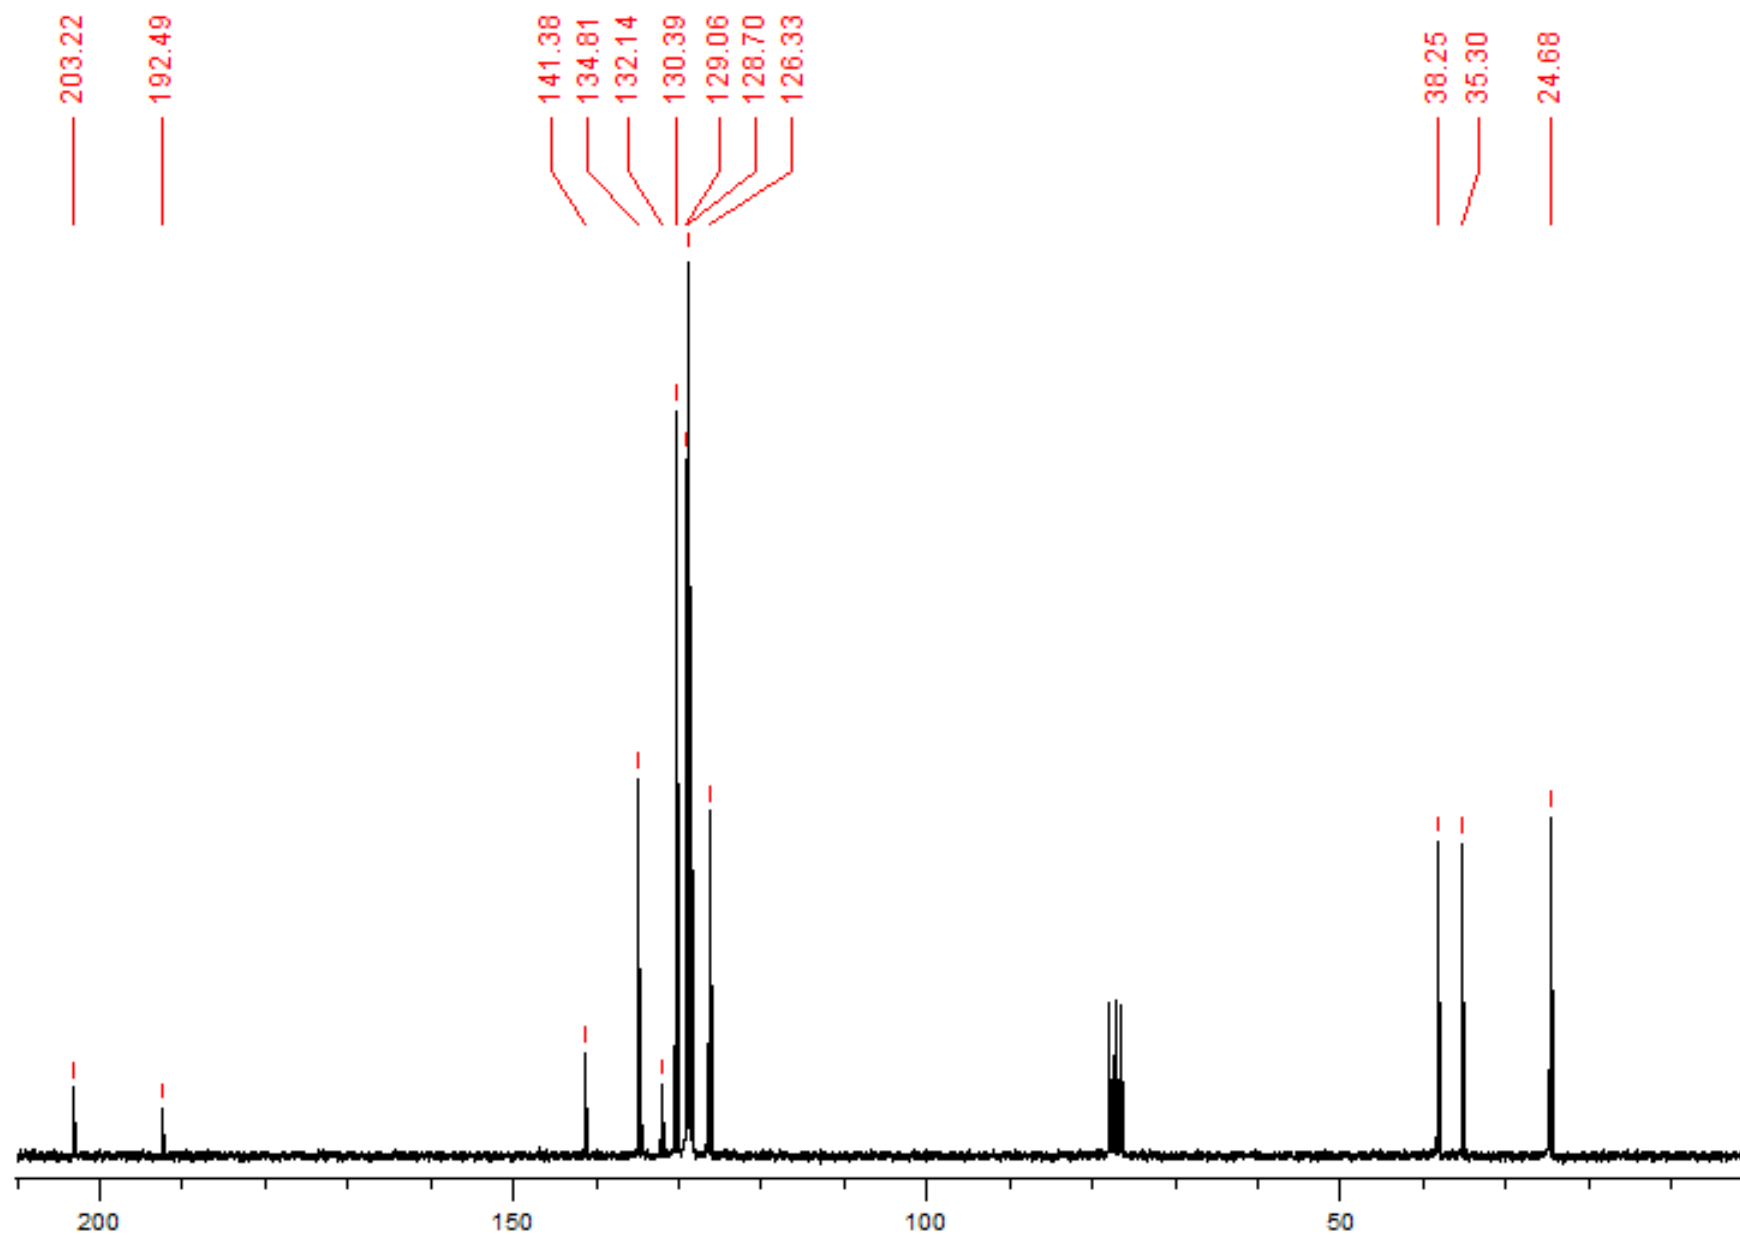



<sup>1</sup>H NMR - Compound **5db**.

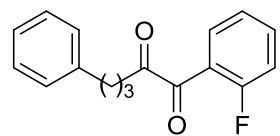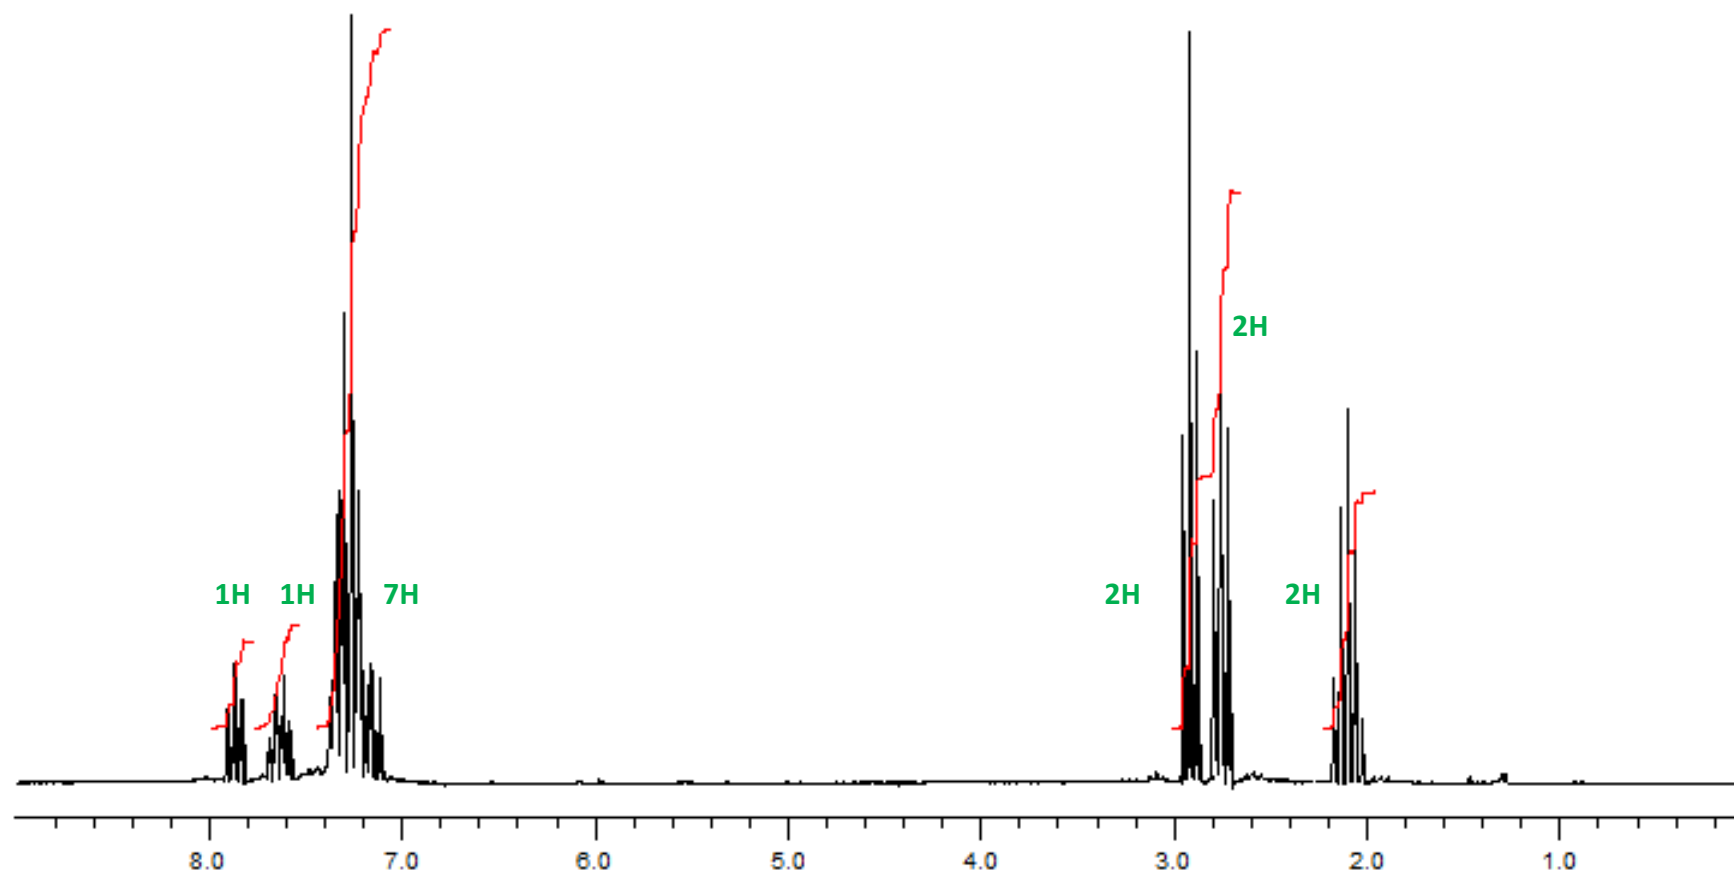

<sup>13</sup>C NMR - Compound **5db**.

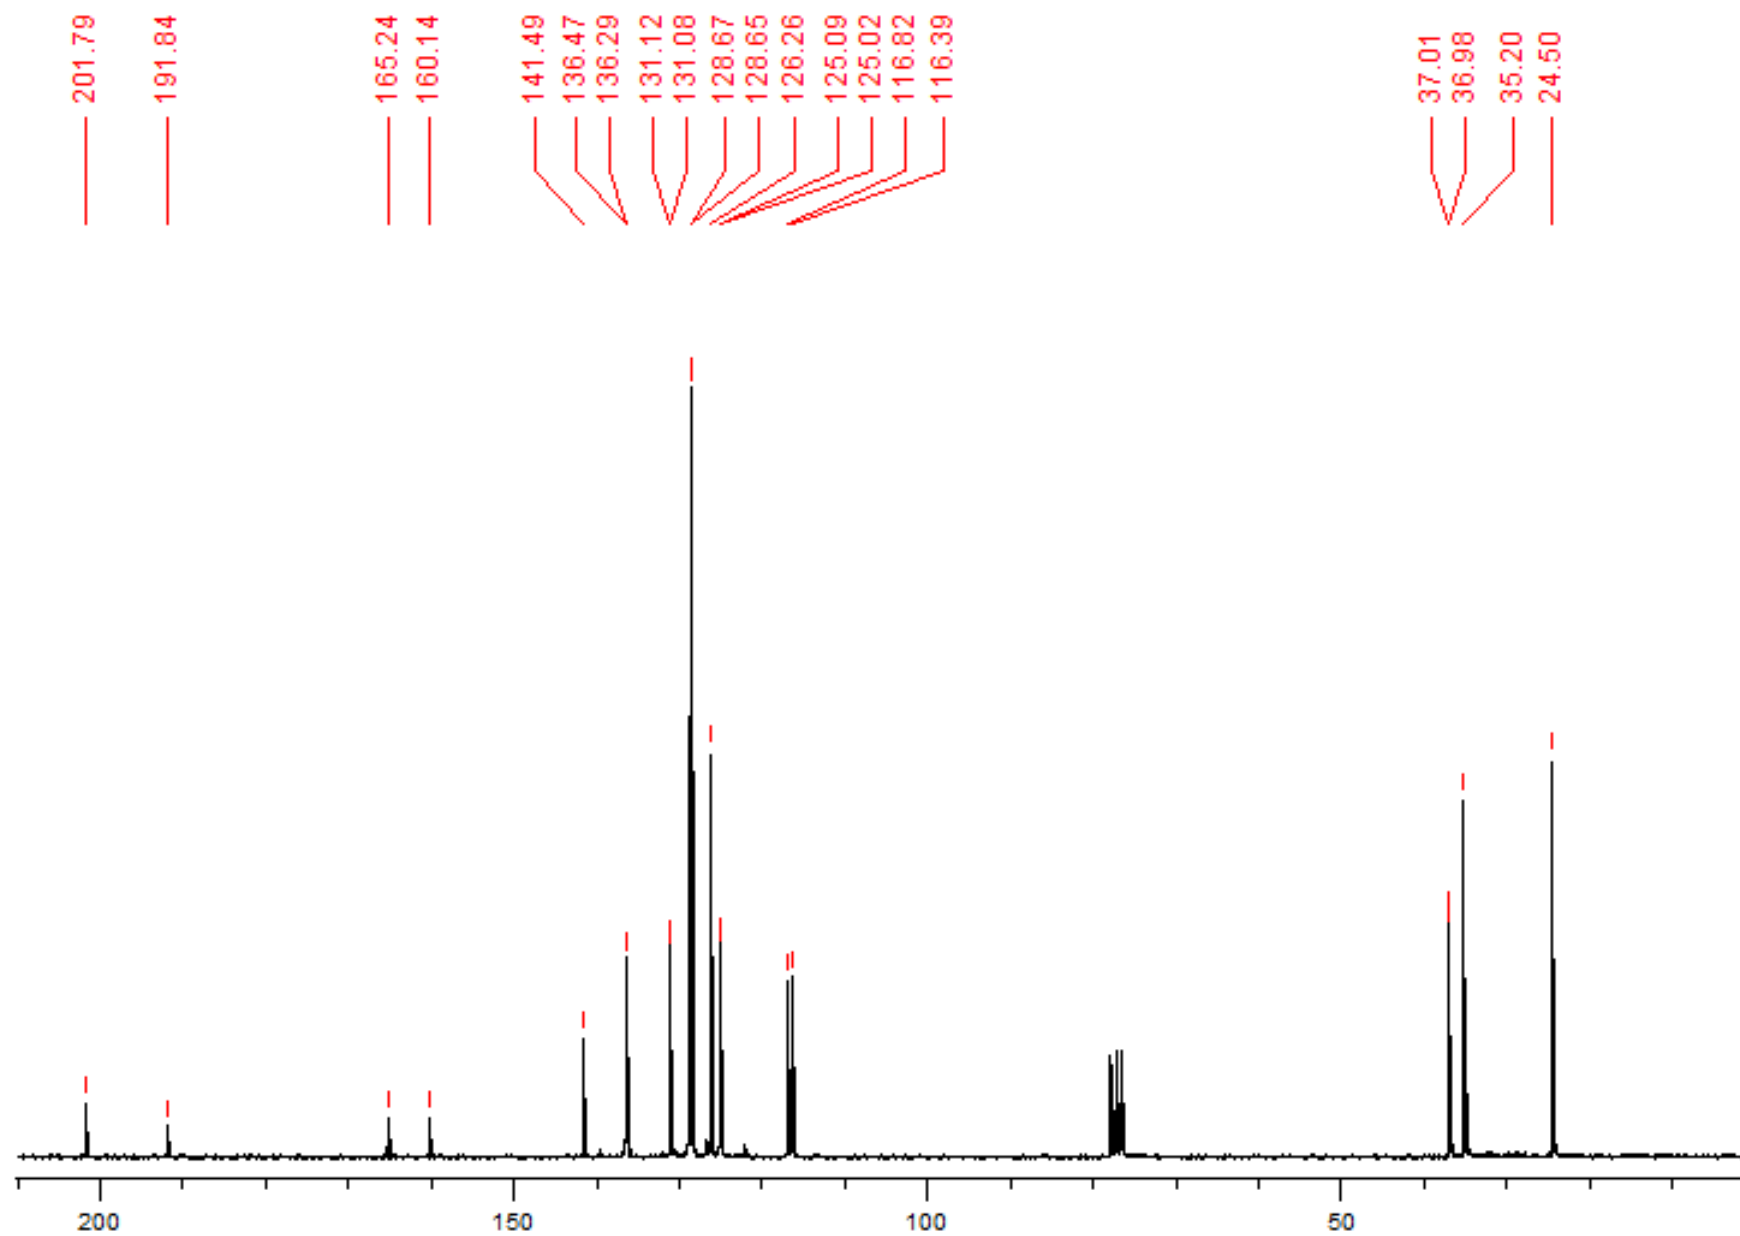

<sup>1</sup>H NMR - Compound **5ec**.

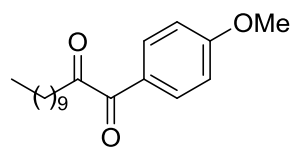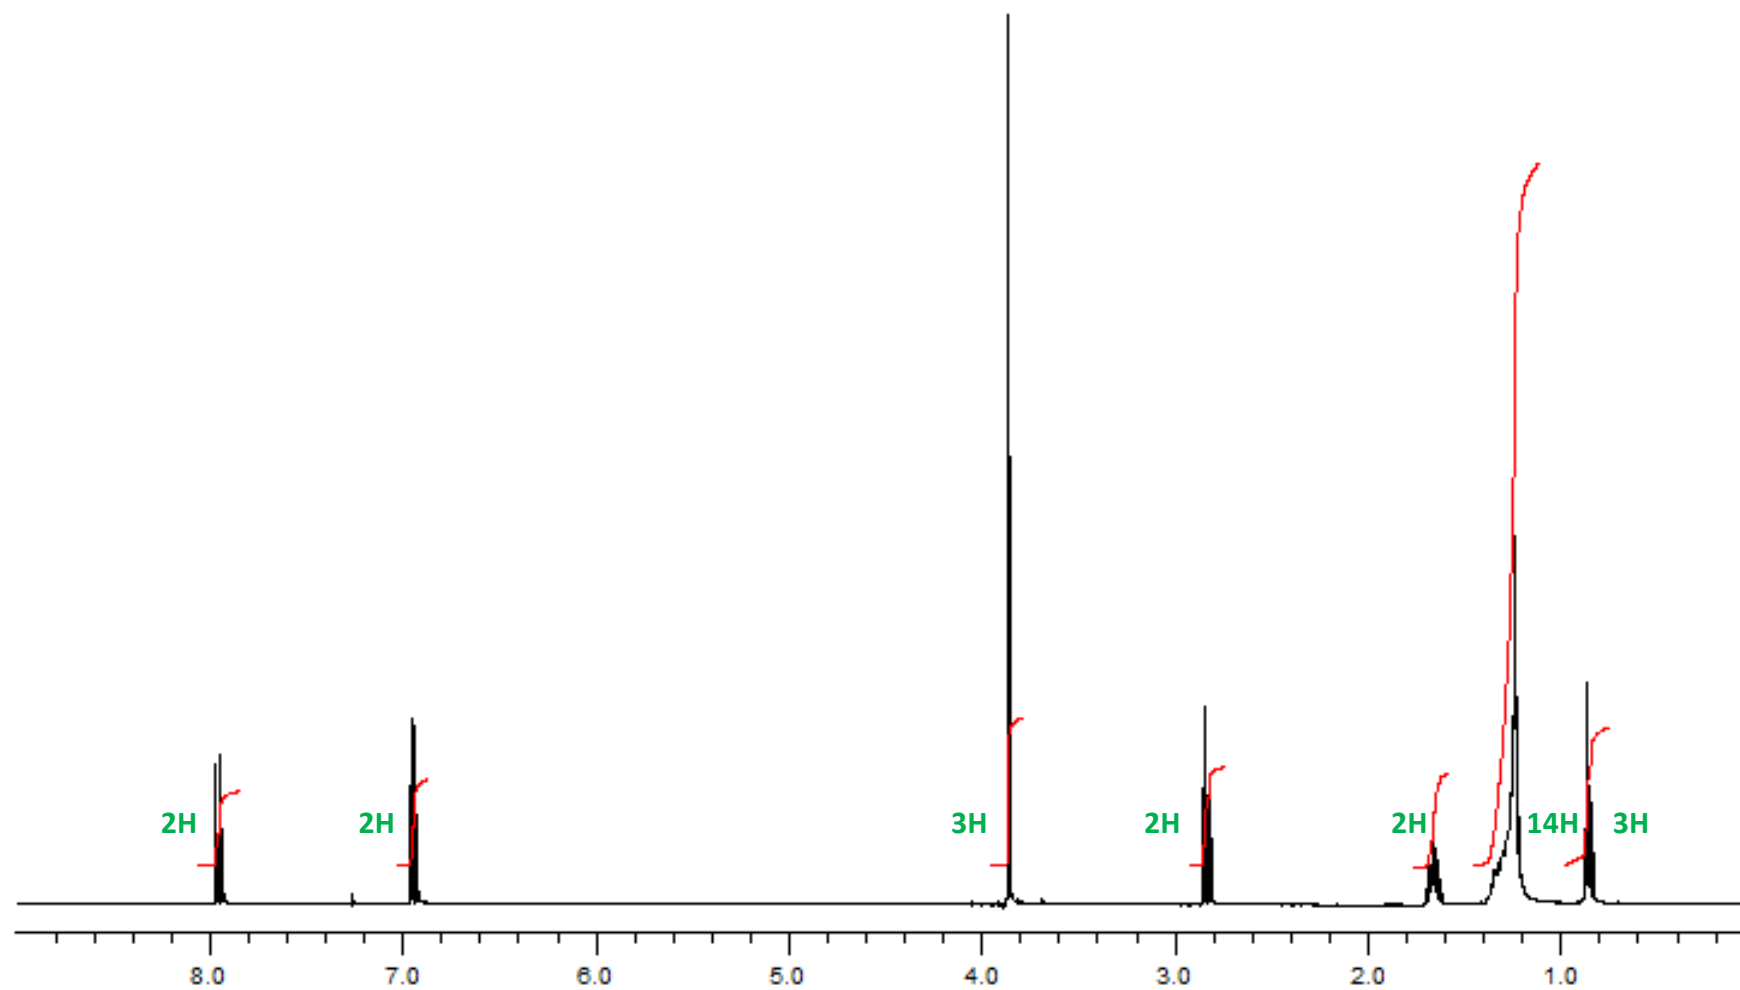

$^{13}\text{C}$  NMR - Compound **5c**.

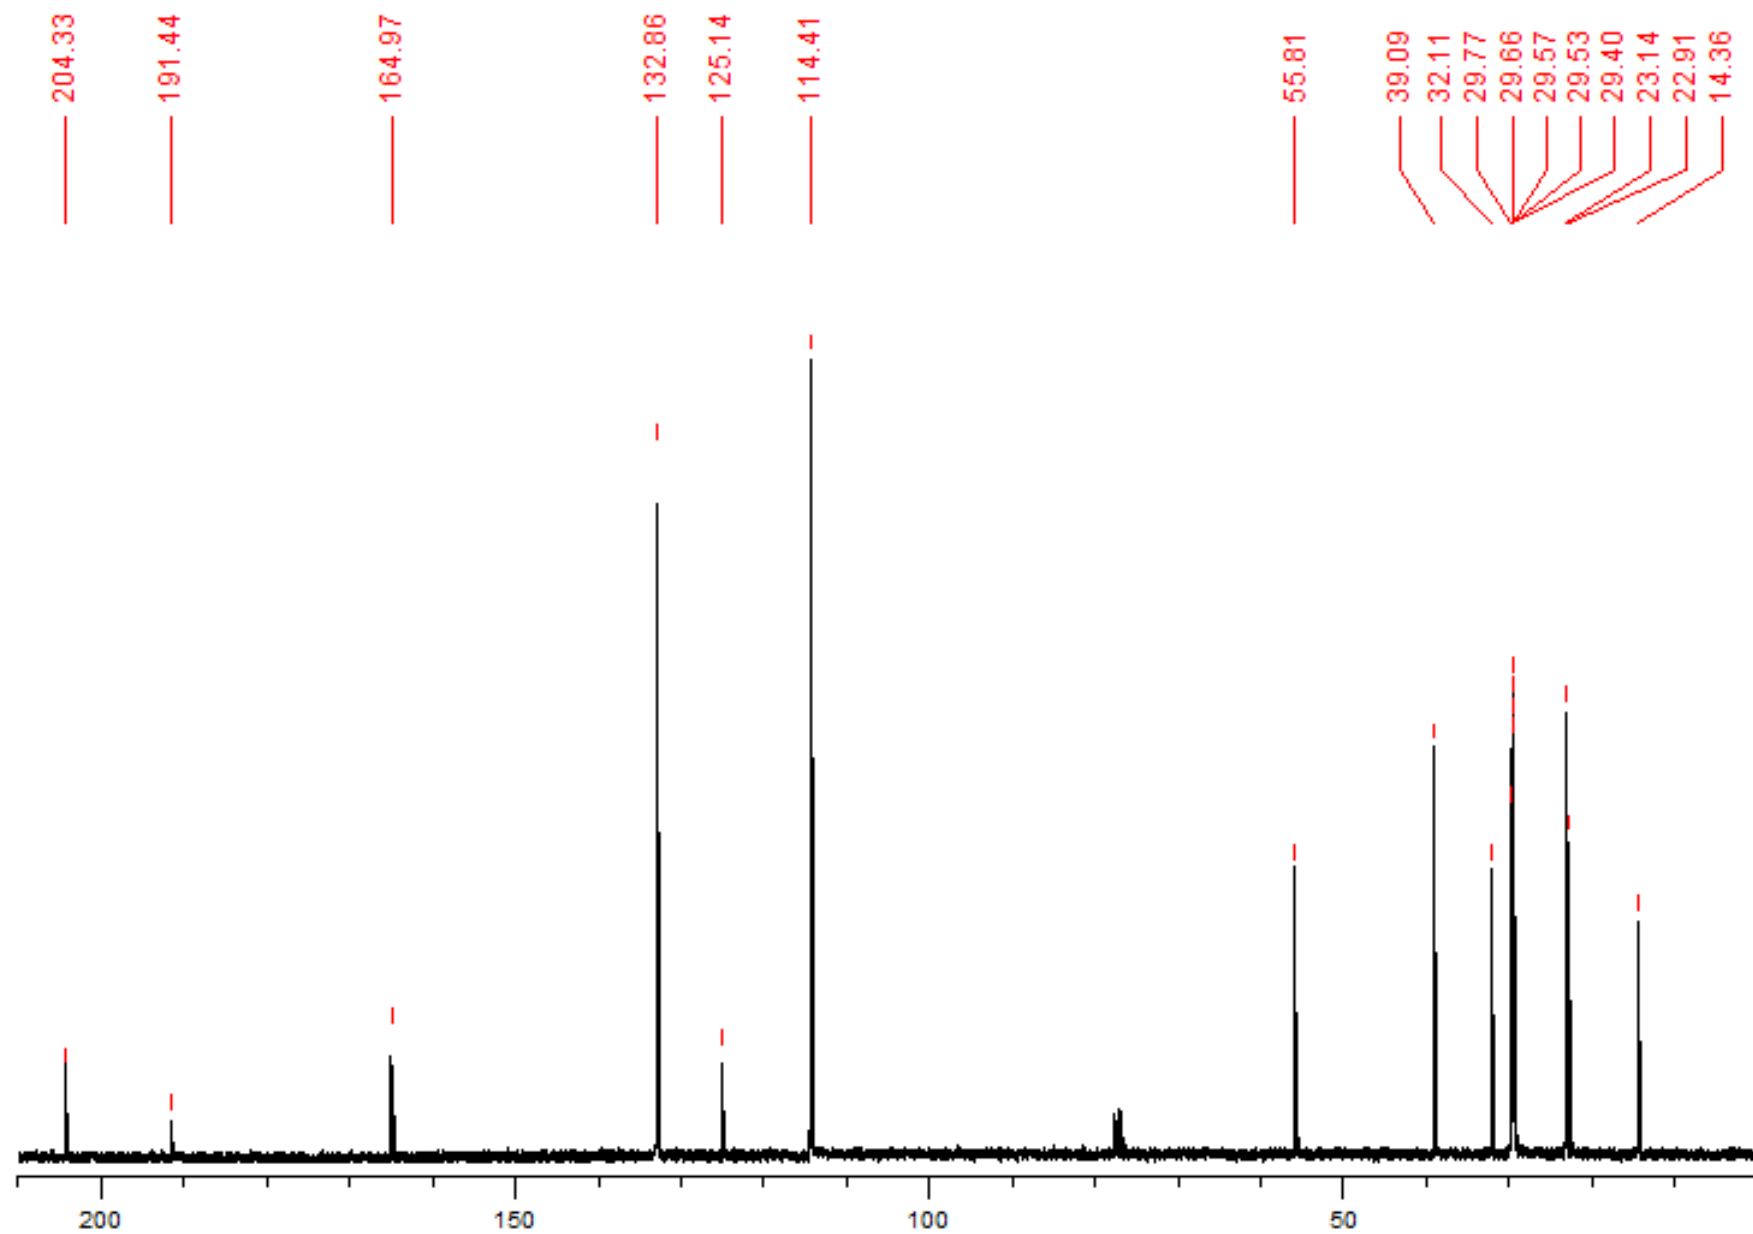

<sup>1</sup>H NMR - Compound **5fc**.

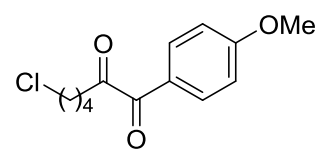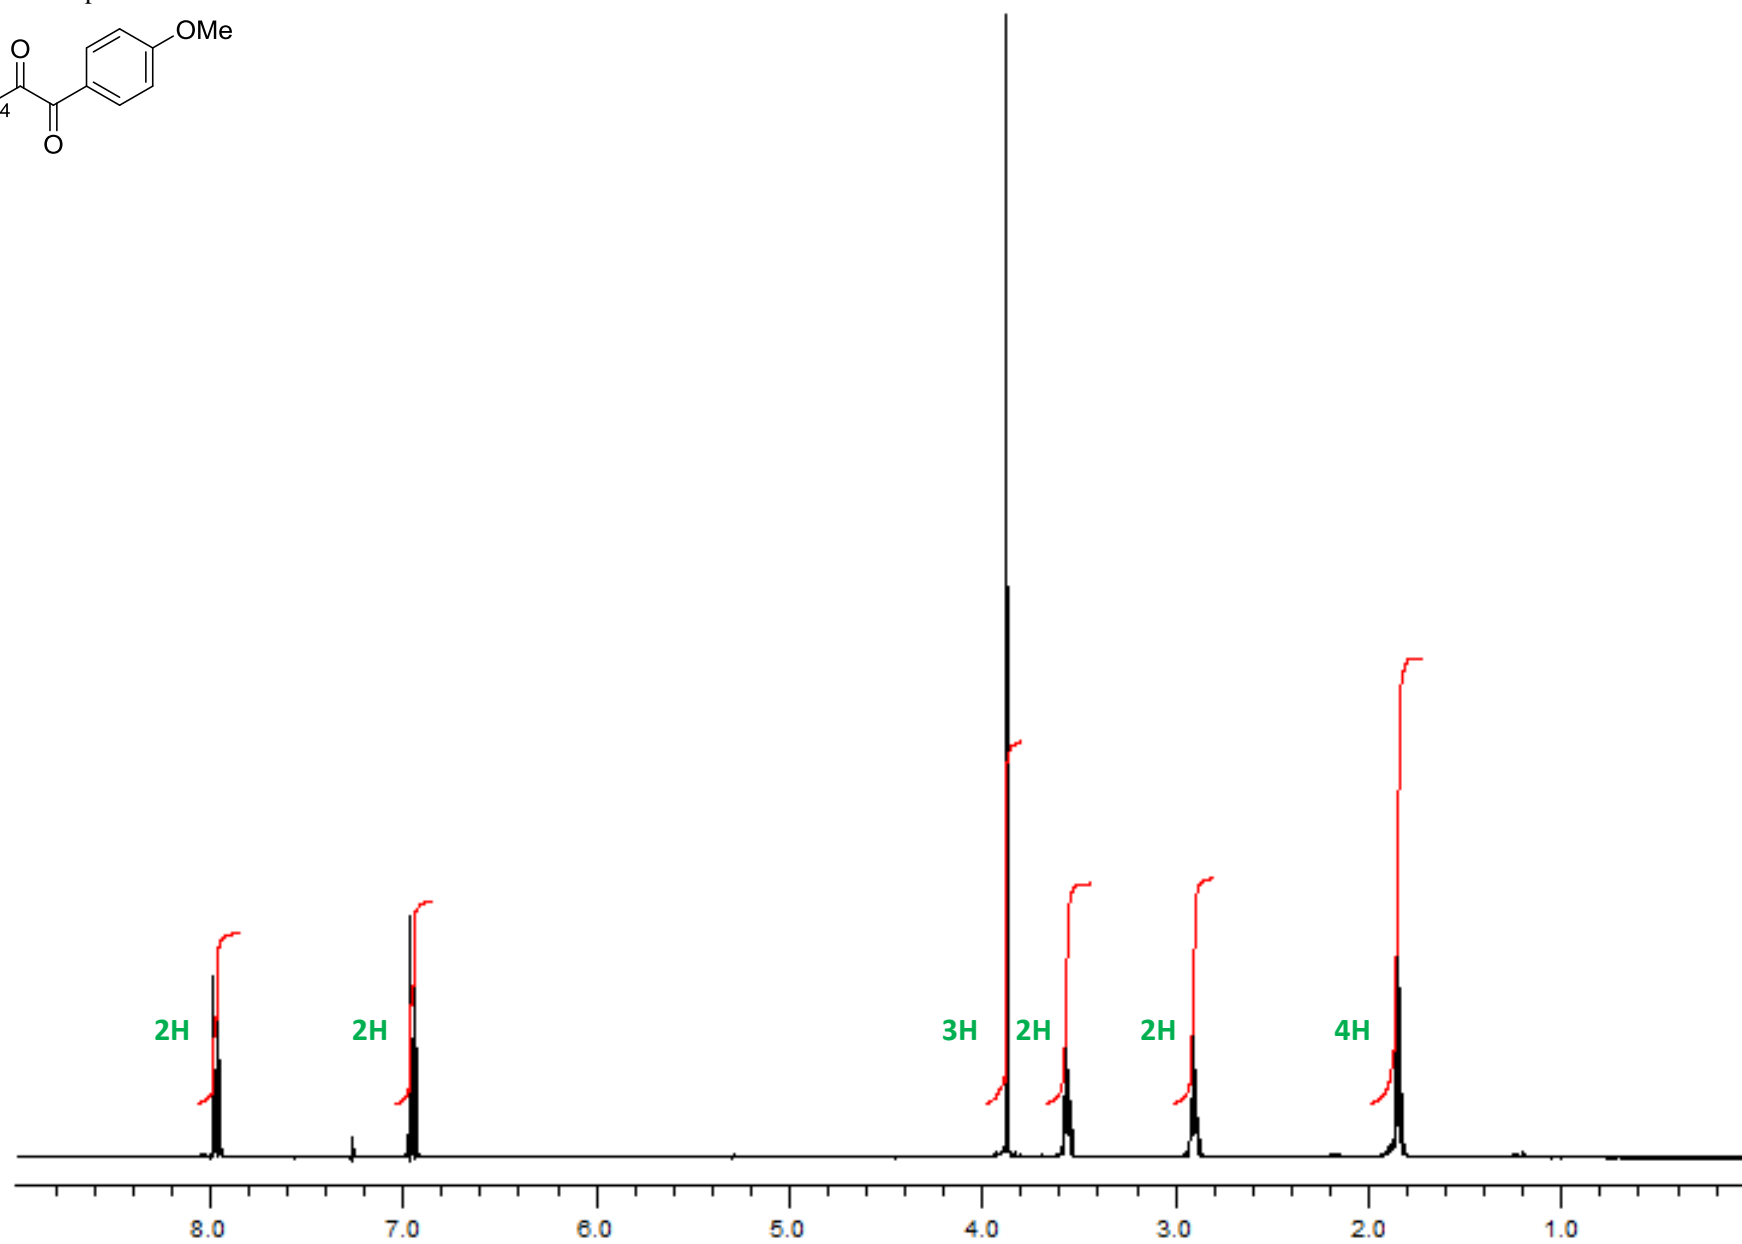

<sup>13</sup>C NMR - Compound **5f**.

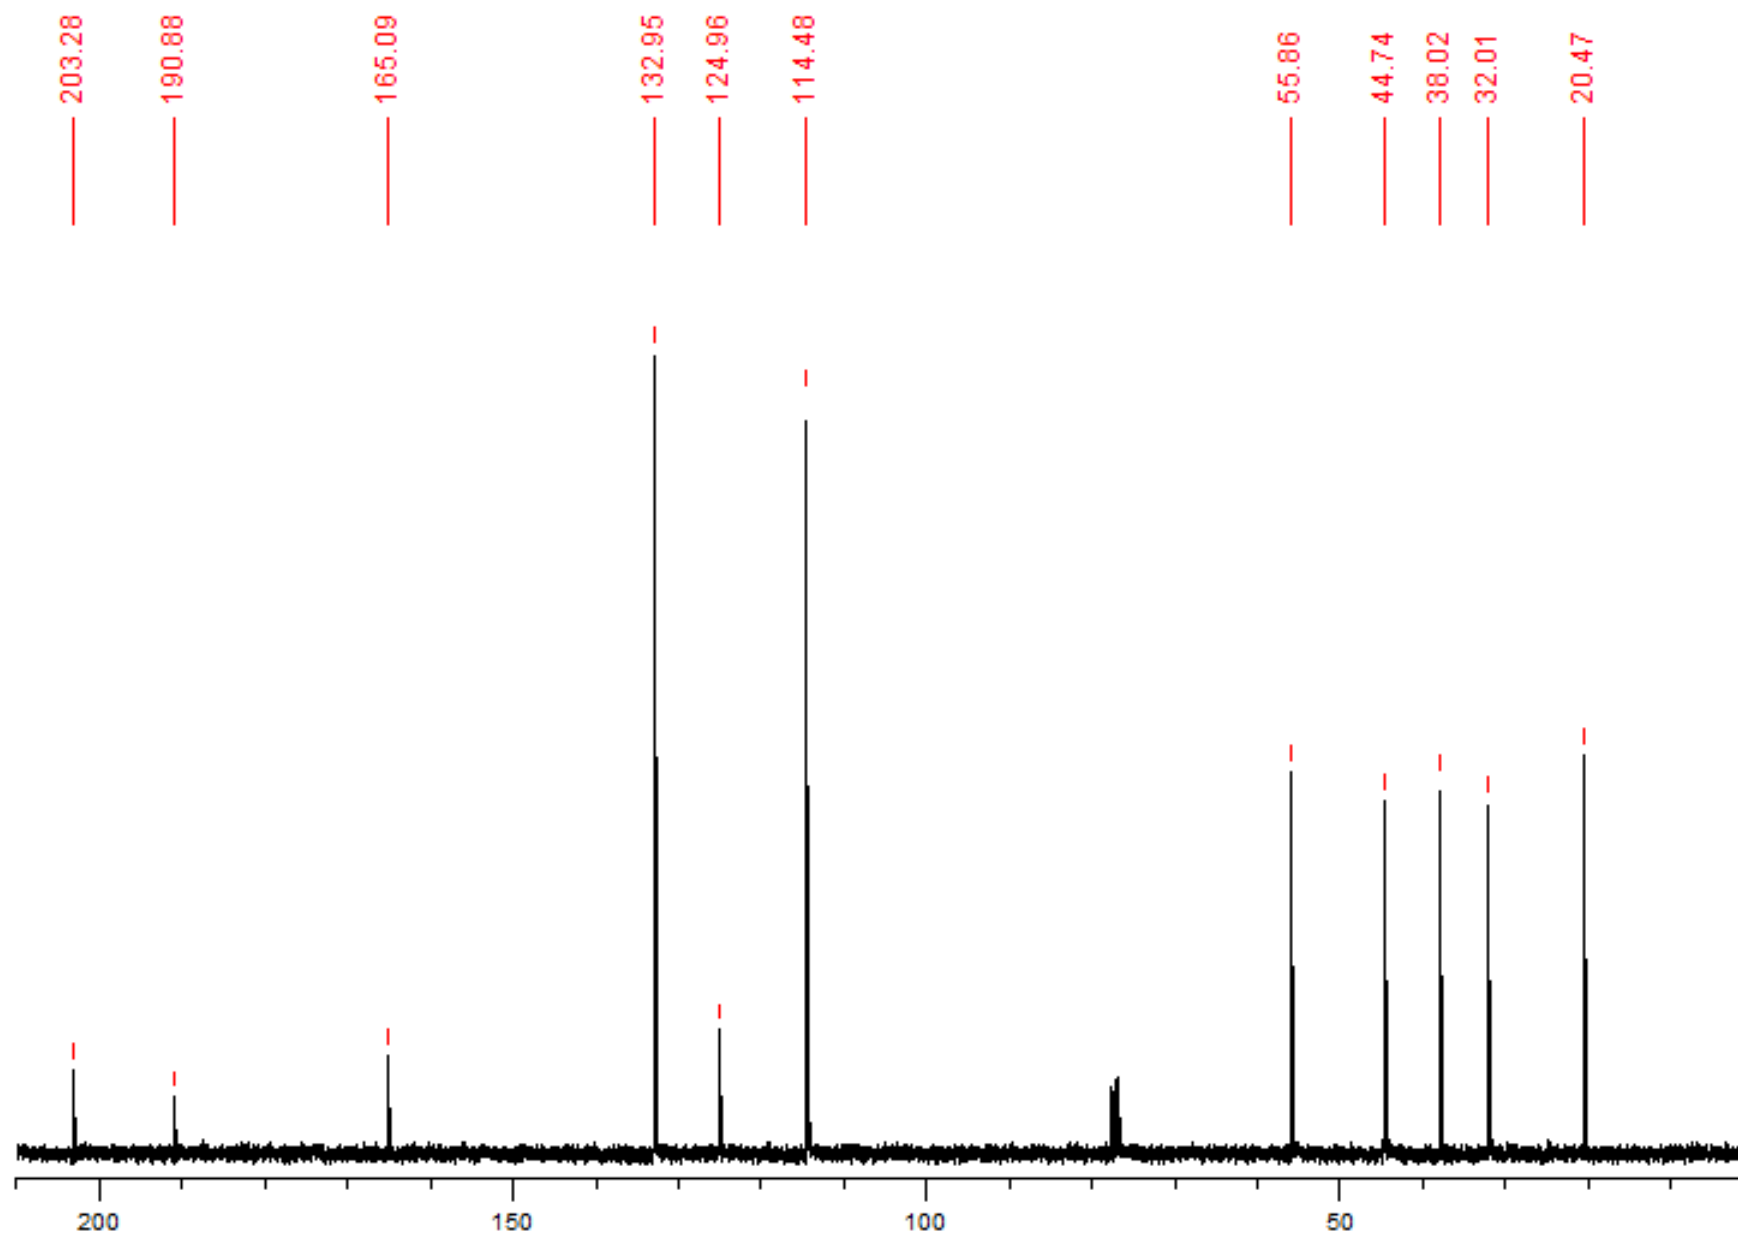

<sup>1</sup>H NMR - Compound **5gd**.

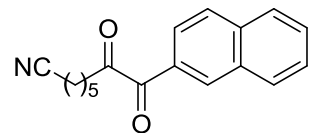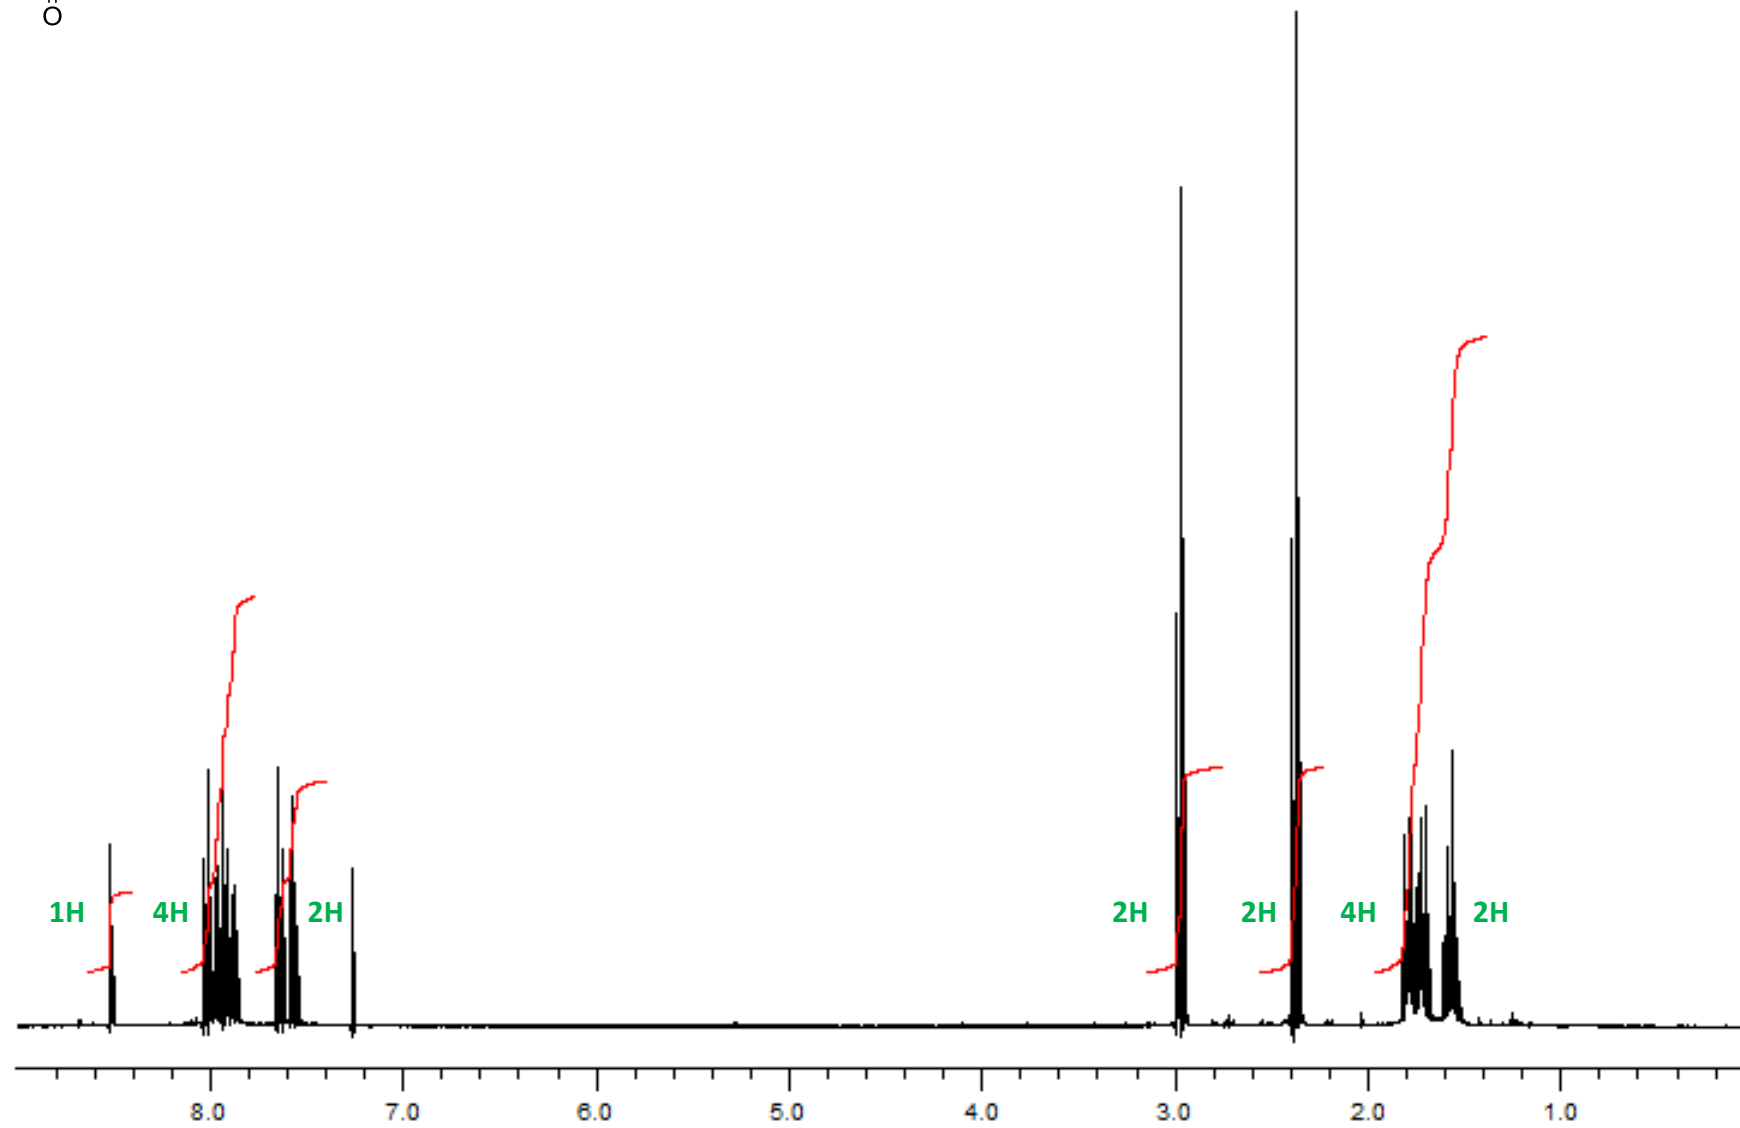

<sup>13</sup>C NMR - Compound **5gd**.

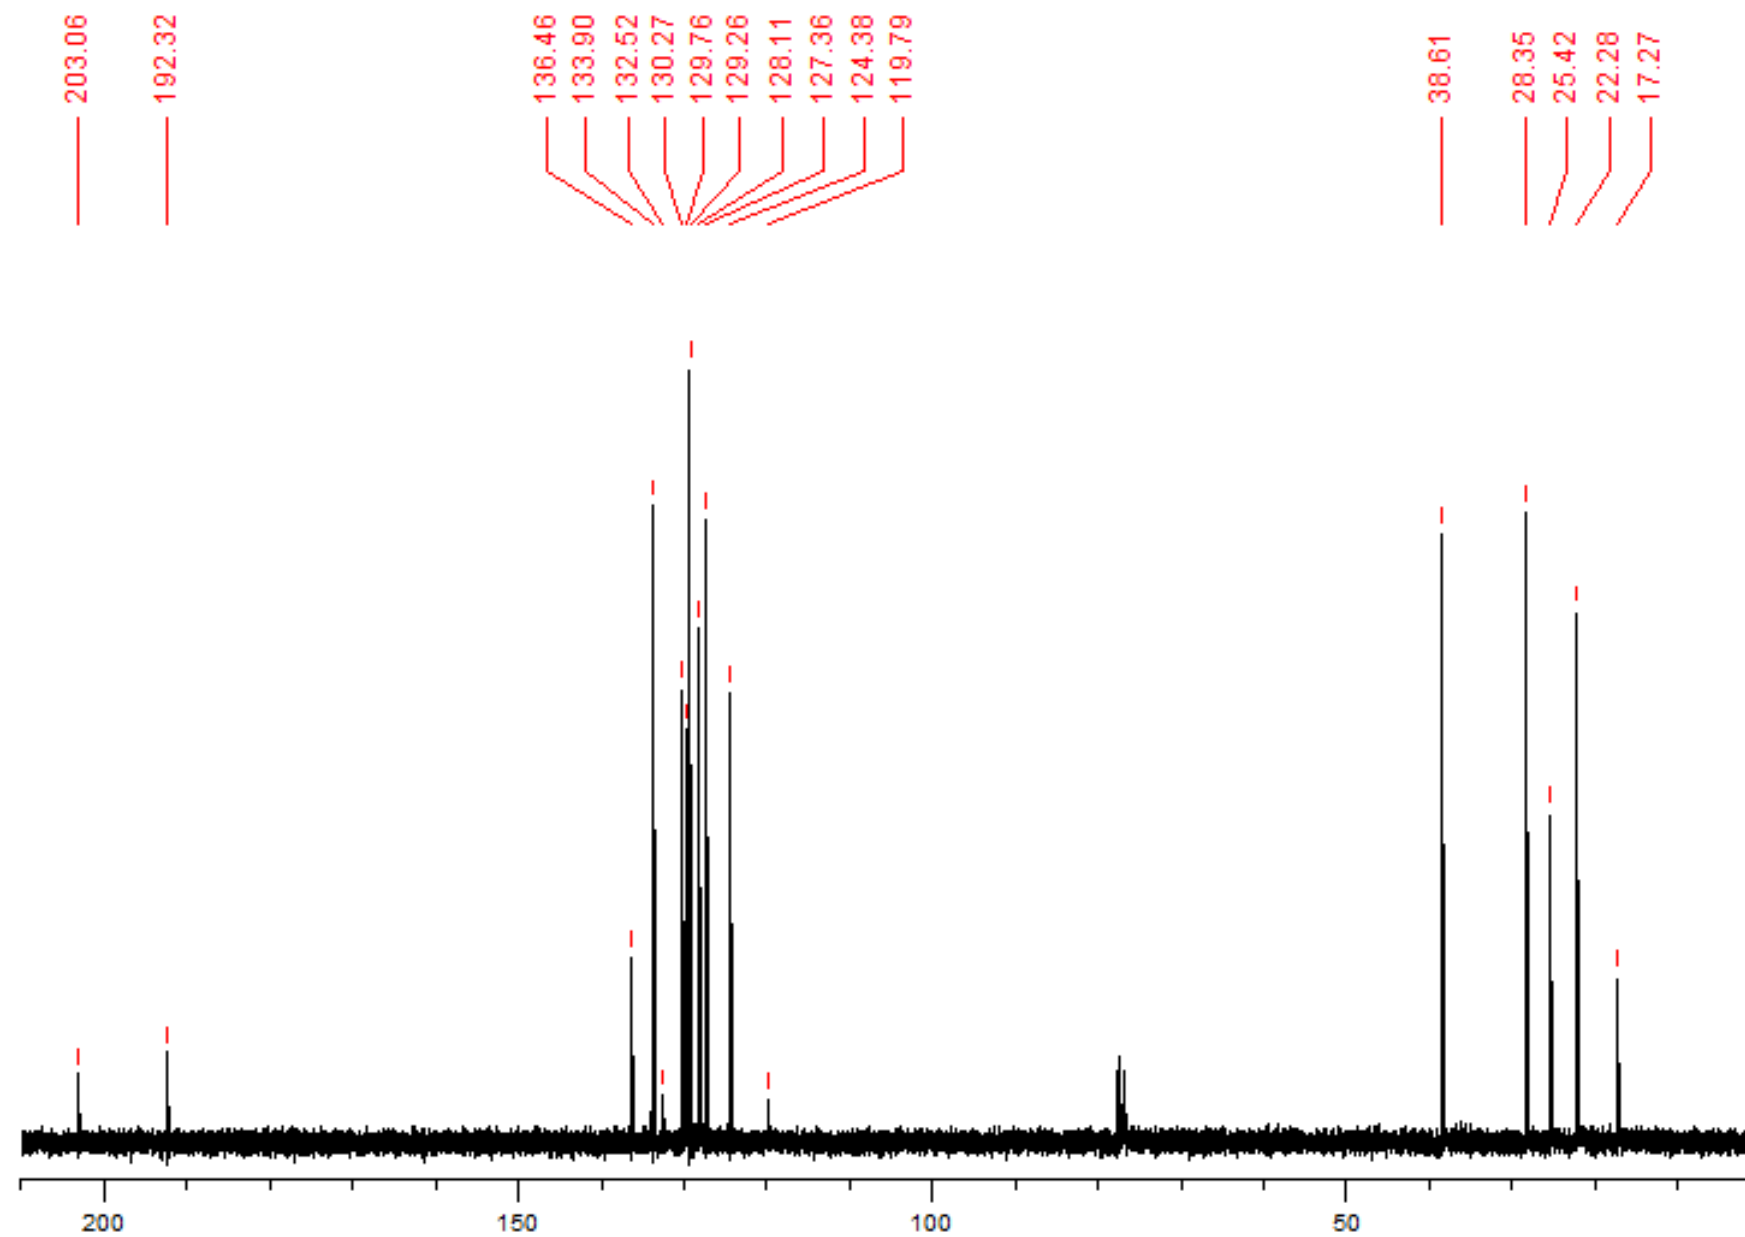



<sup>1</sup>H NMR - Compound **5hd**.

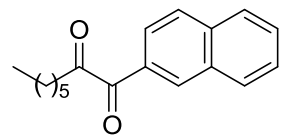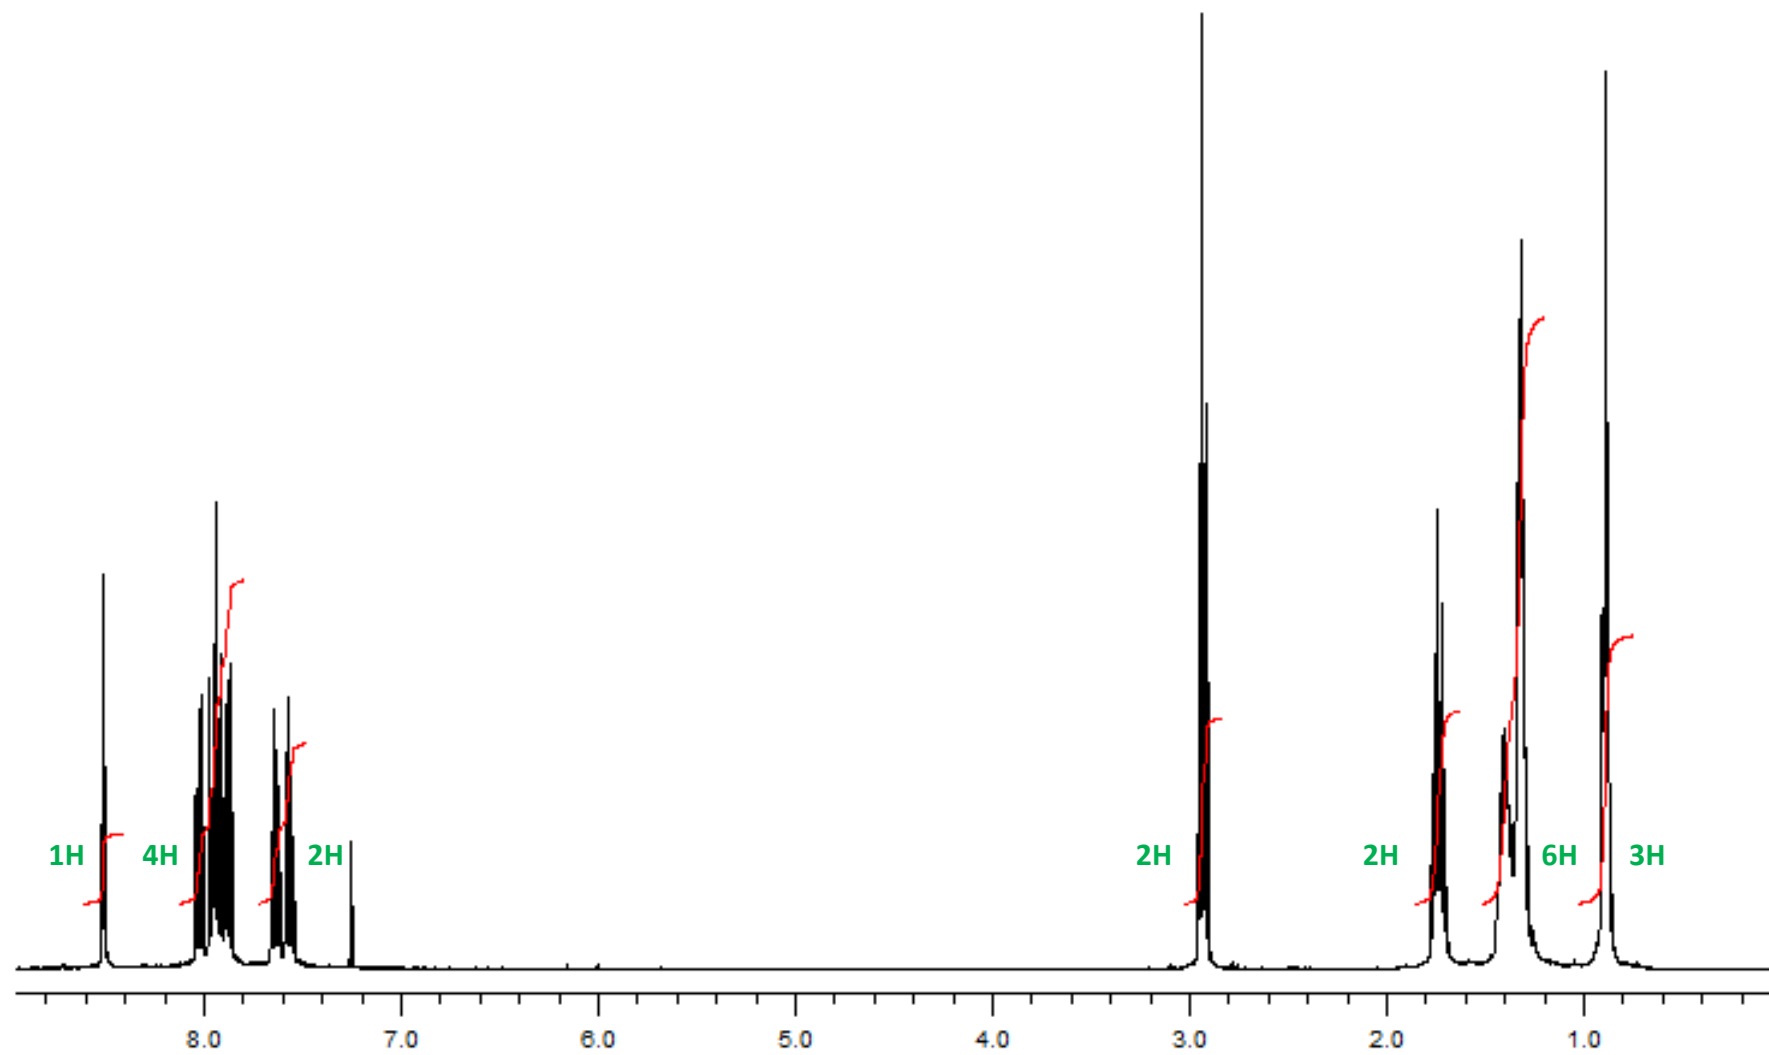

$^{13}\text{C}$  NMR - Compound **5hd**.

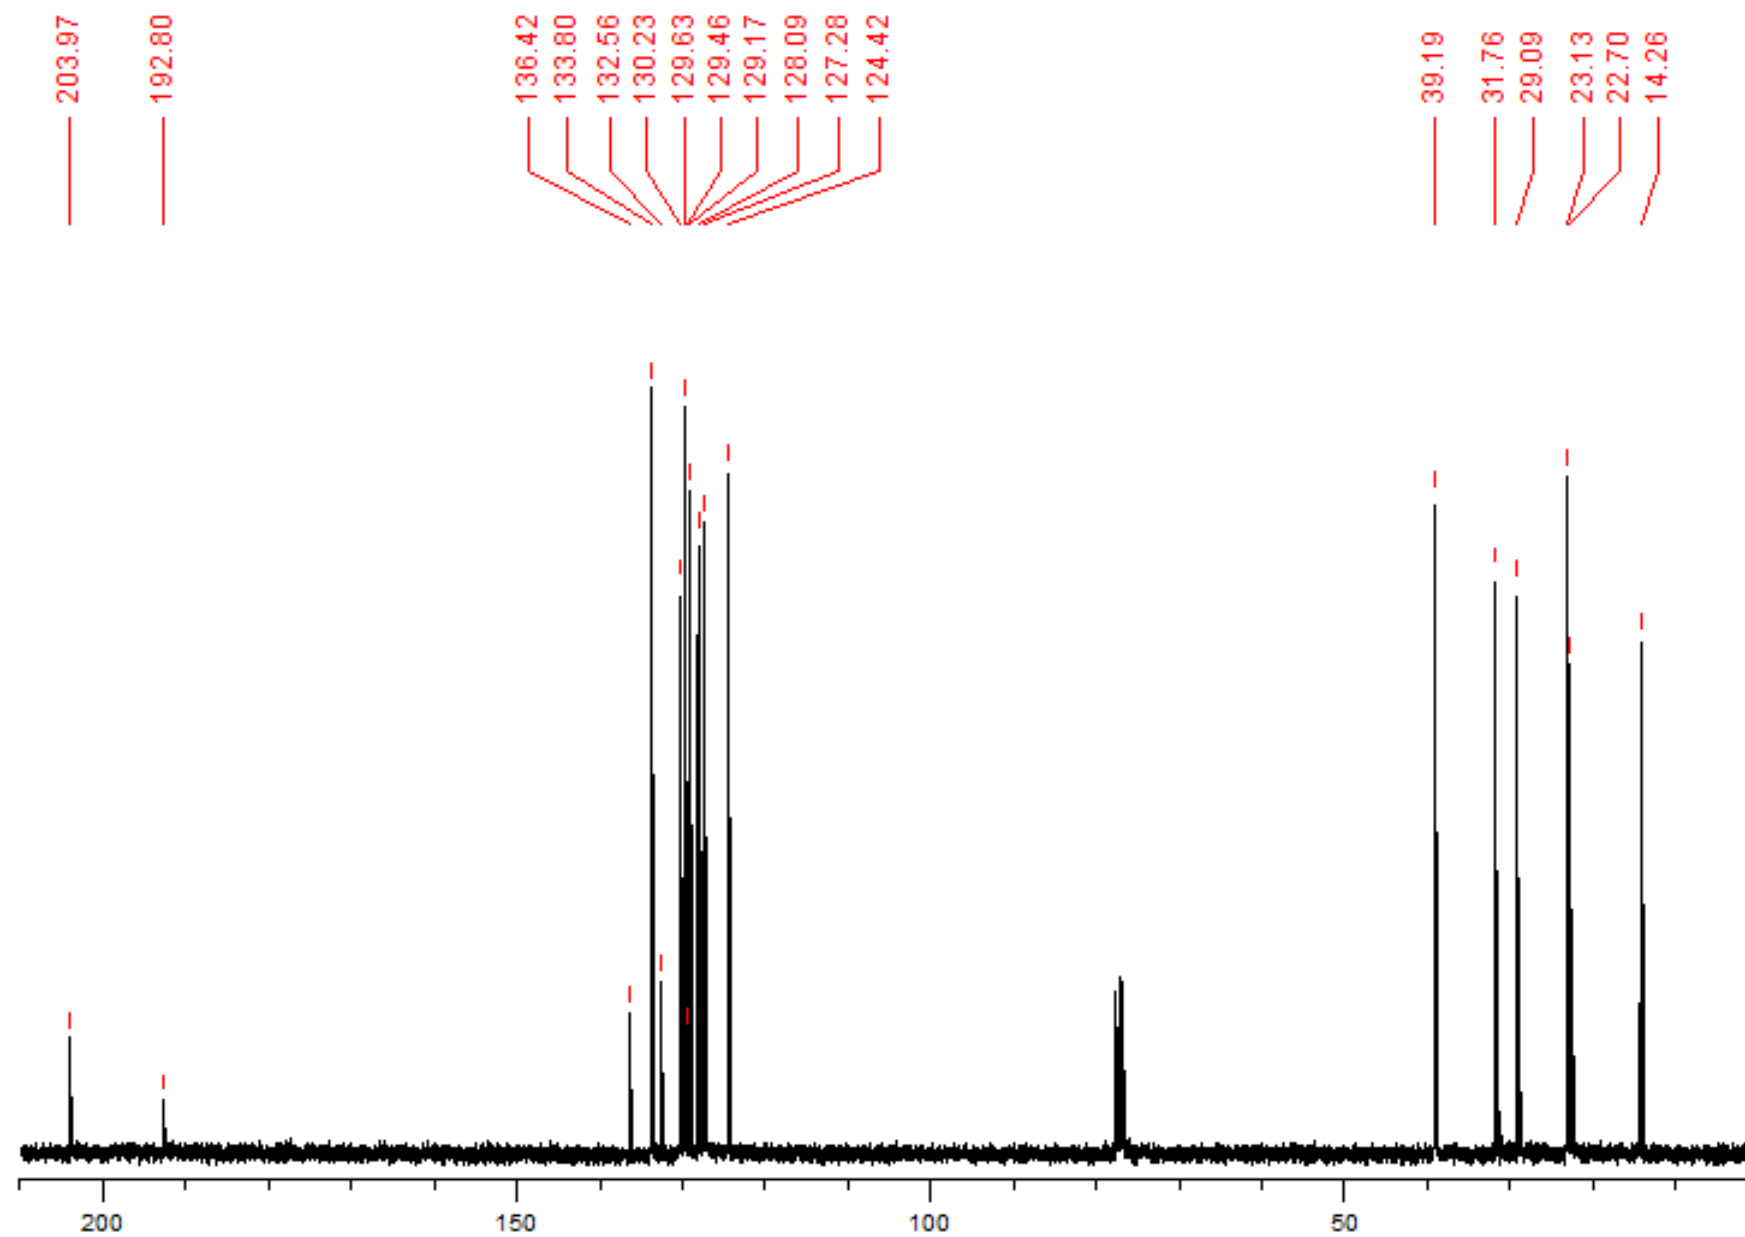

<sup>1</sup>H NMR - Compound **5ia**.

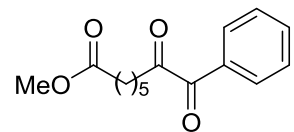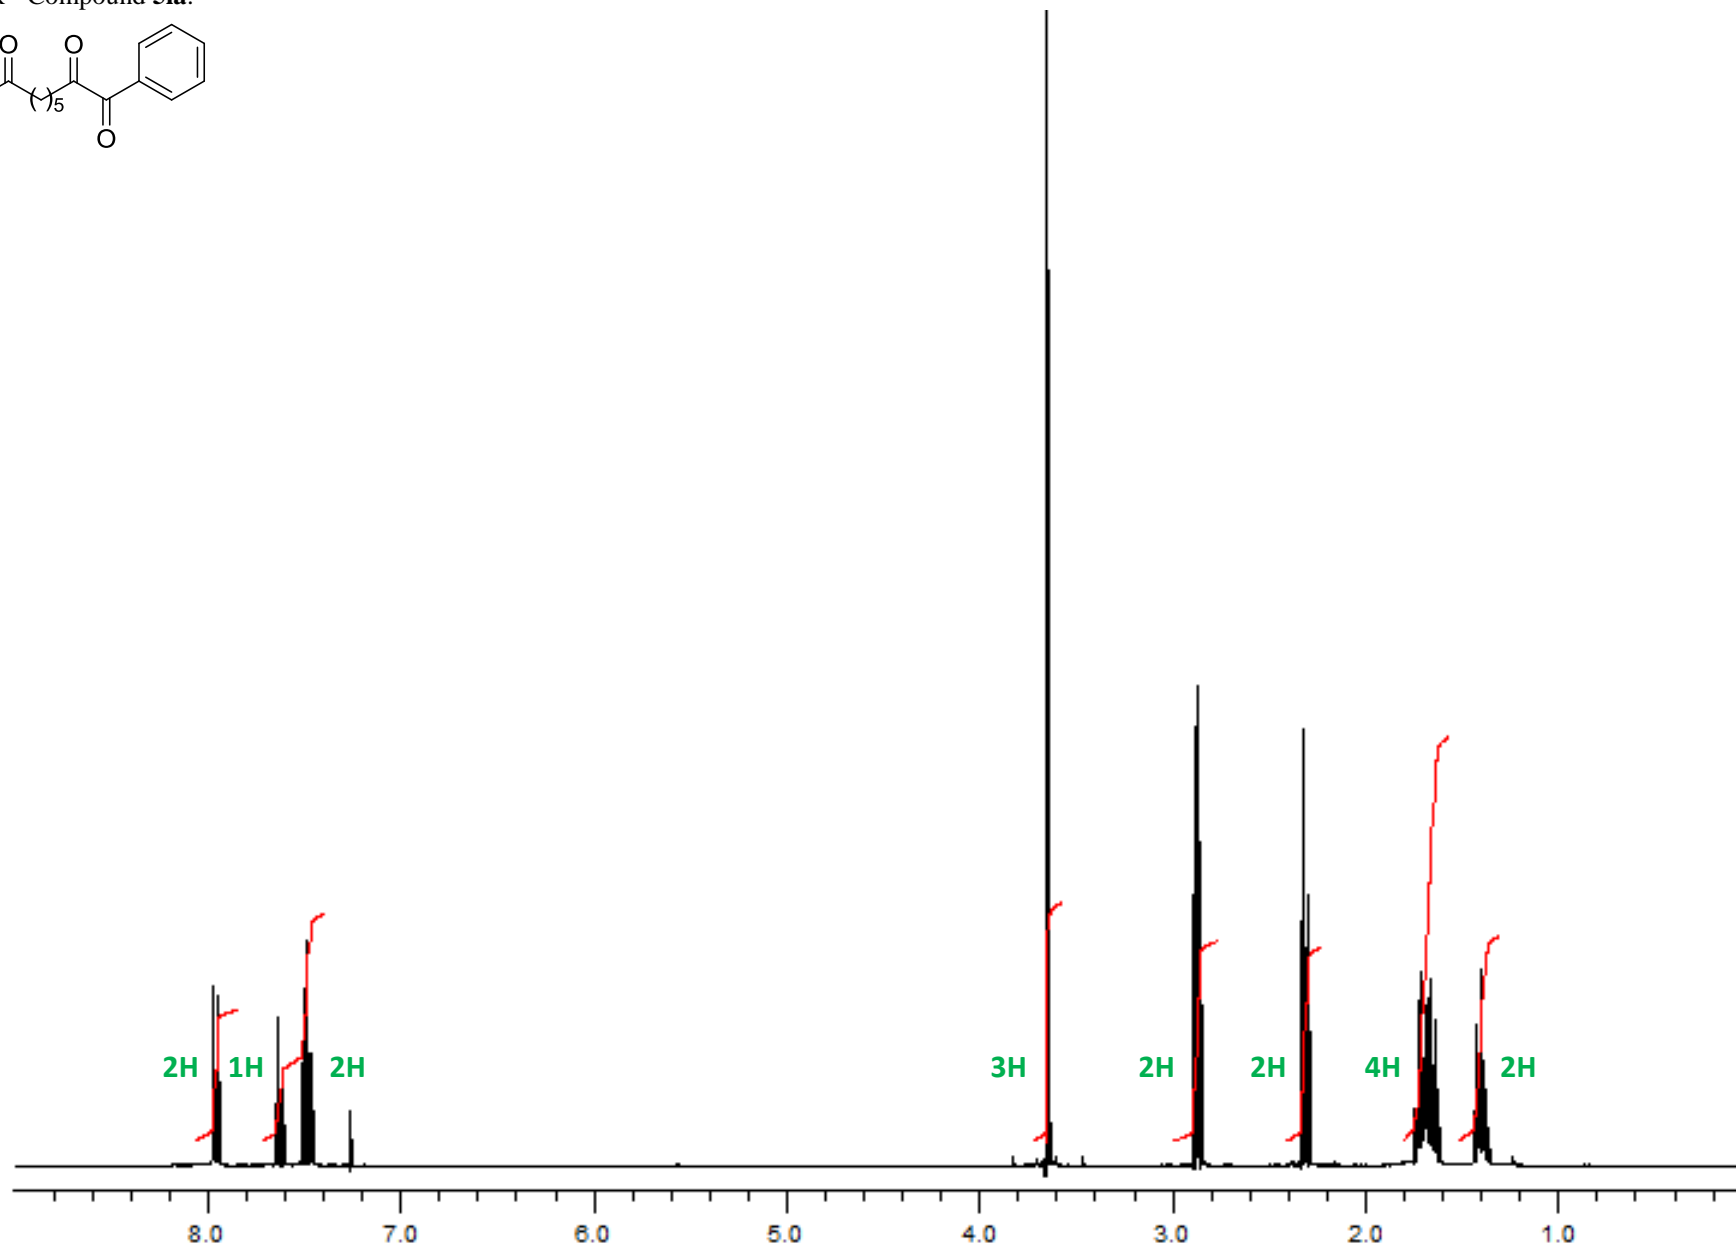

<sup>13</sup>C NMR - Compound **5ia**.

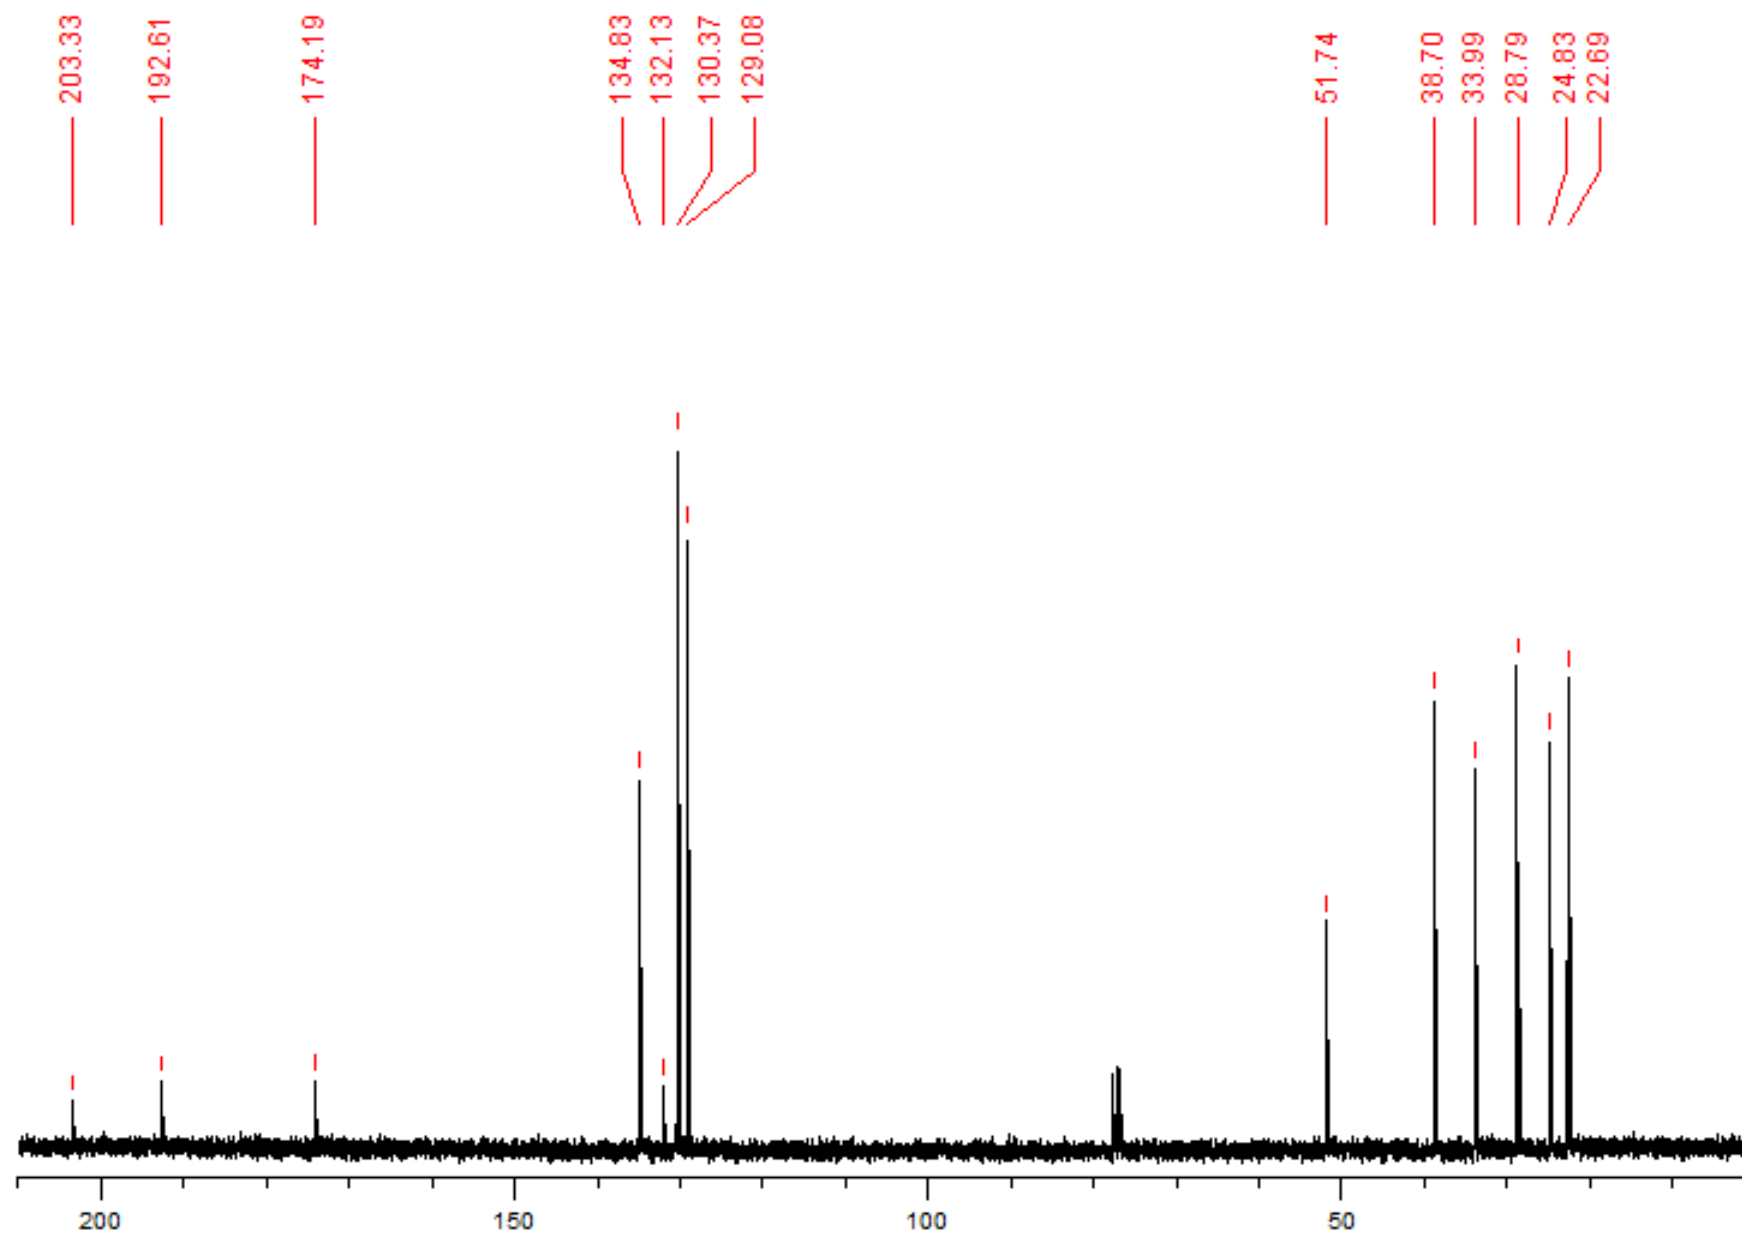

<sup>1</sup>H NMR - Compound **5je**.

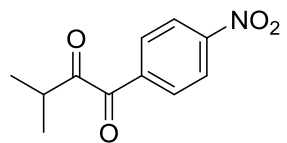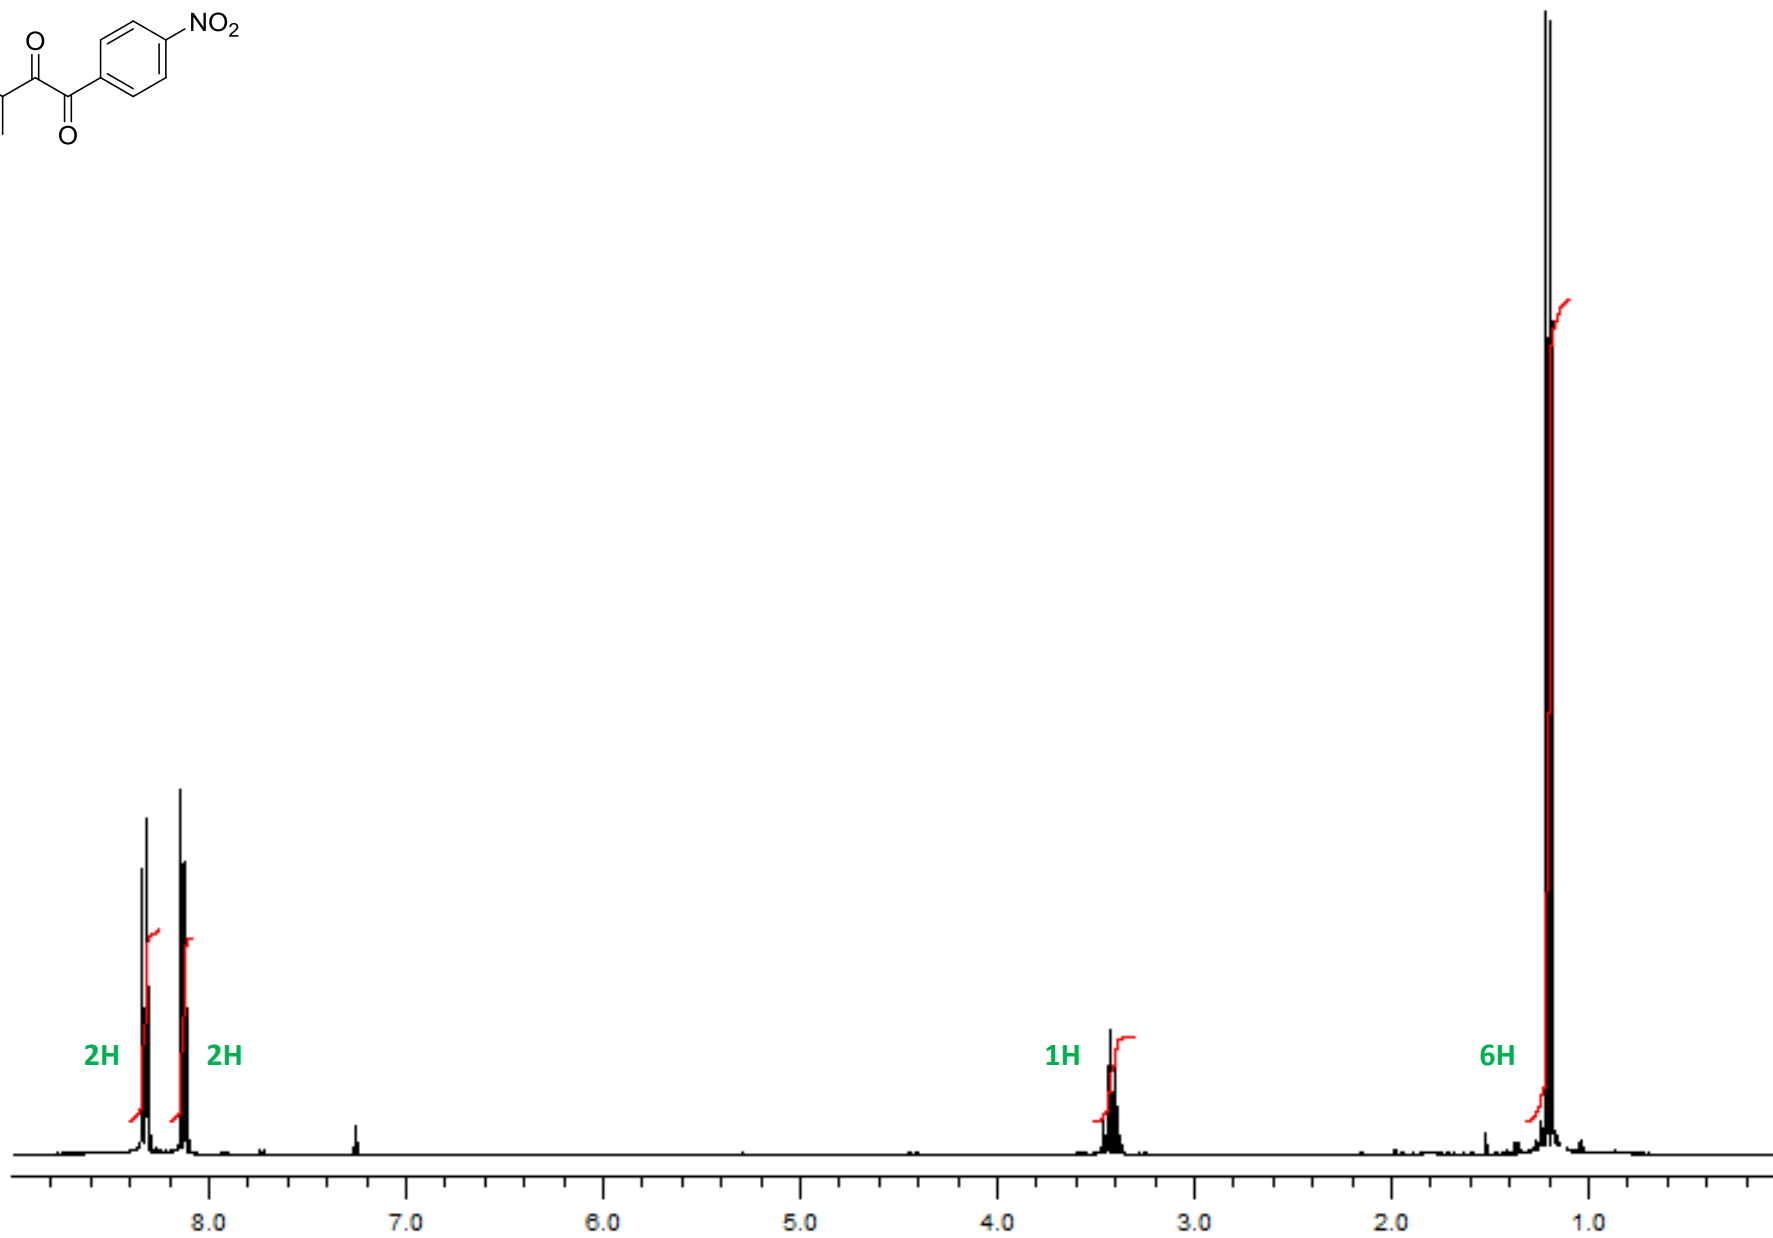

<sup>13</sup>C NMR - Compound **5je**.

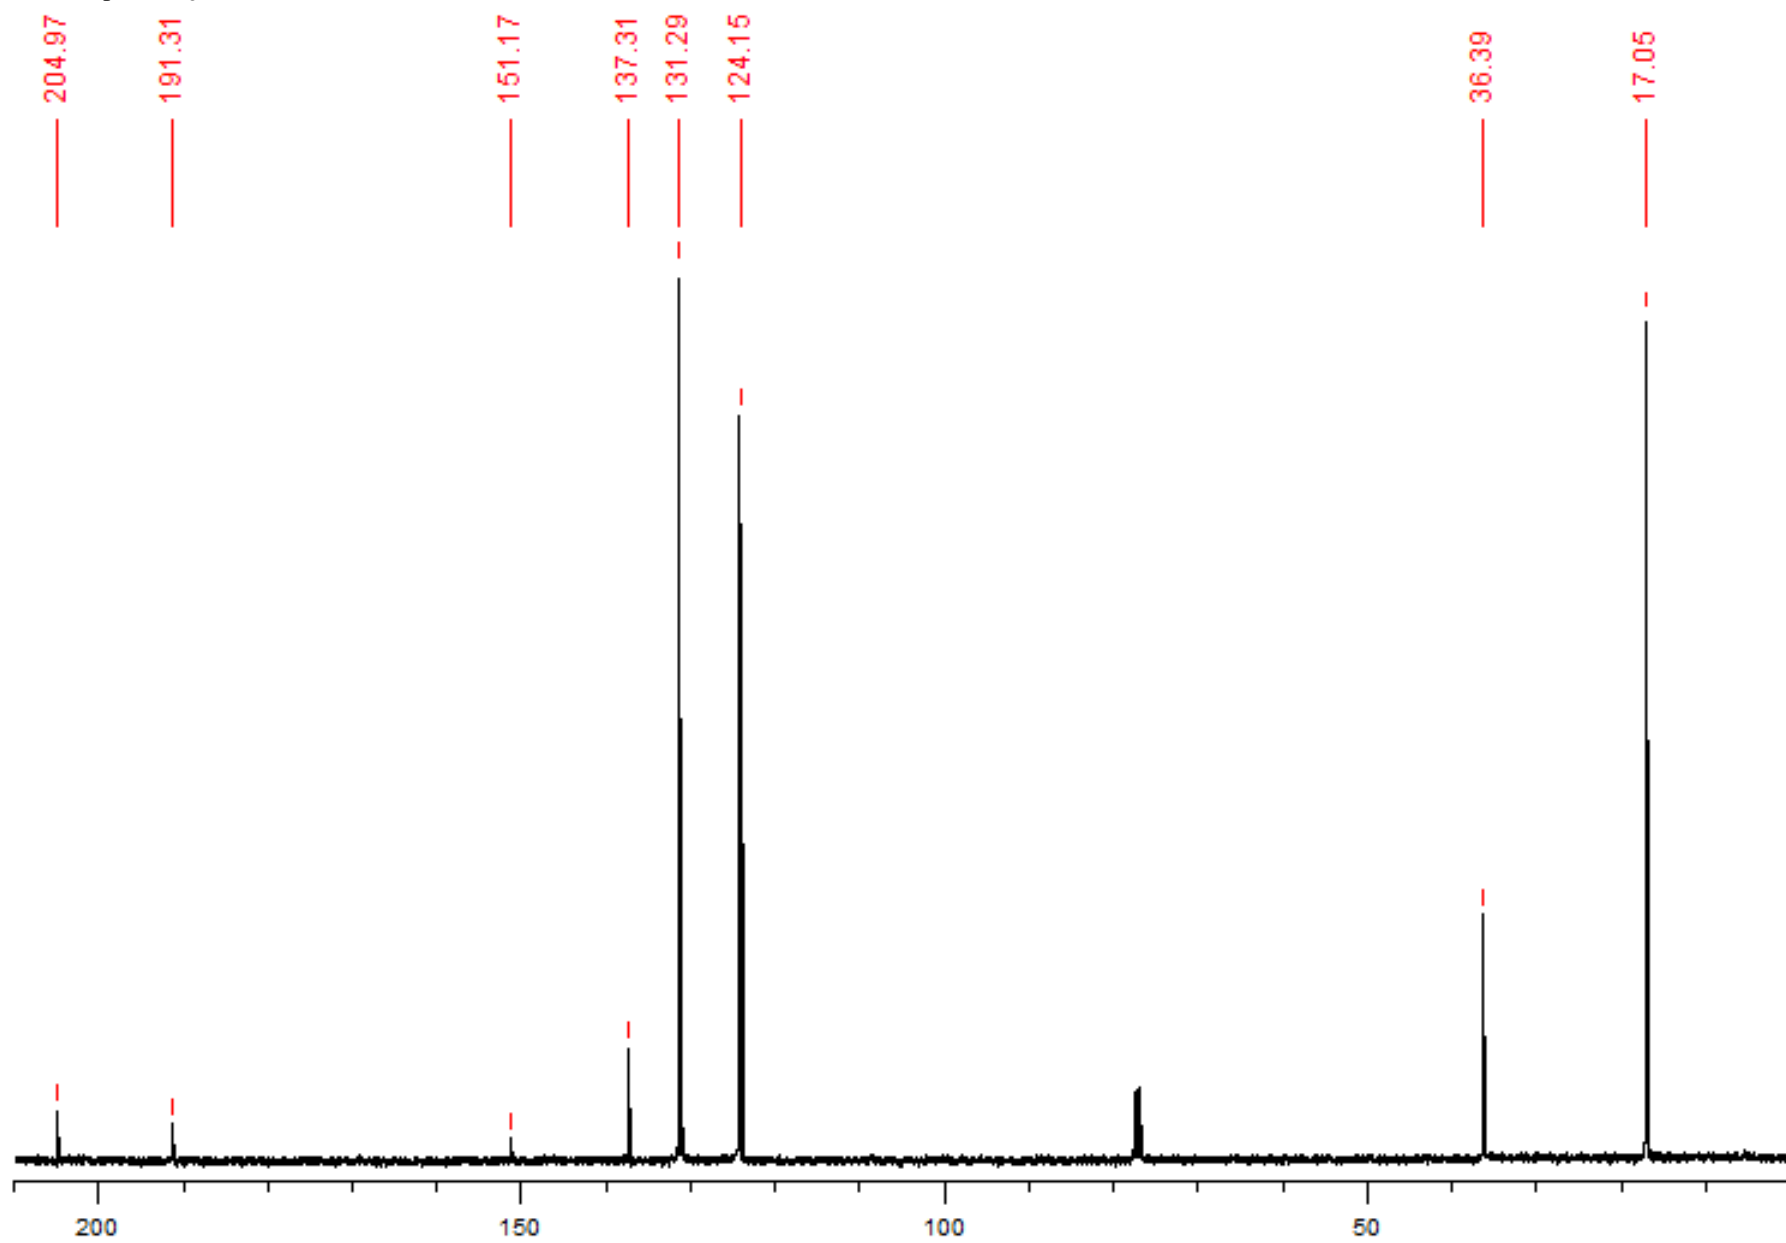

<sup>1</sup>H NMR - Compound **5ka**.

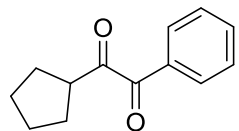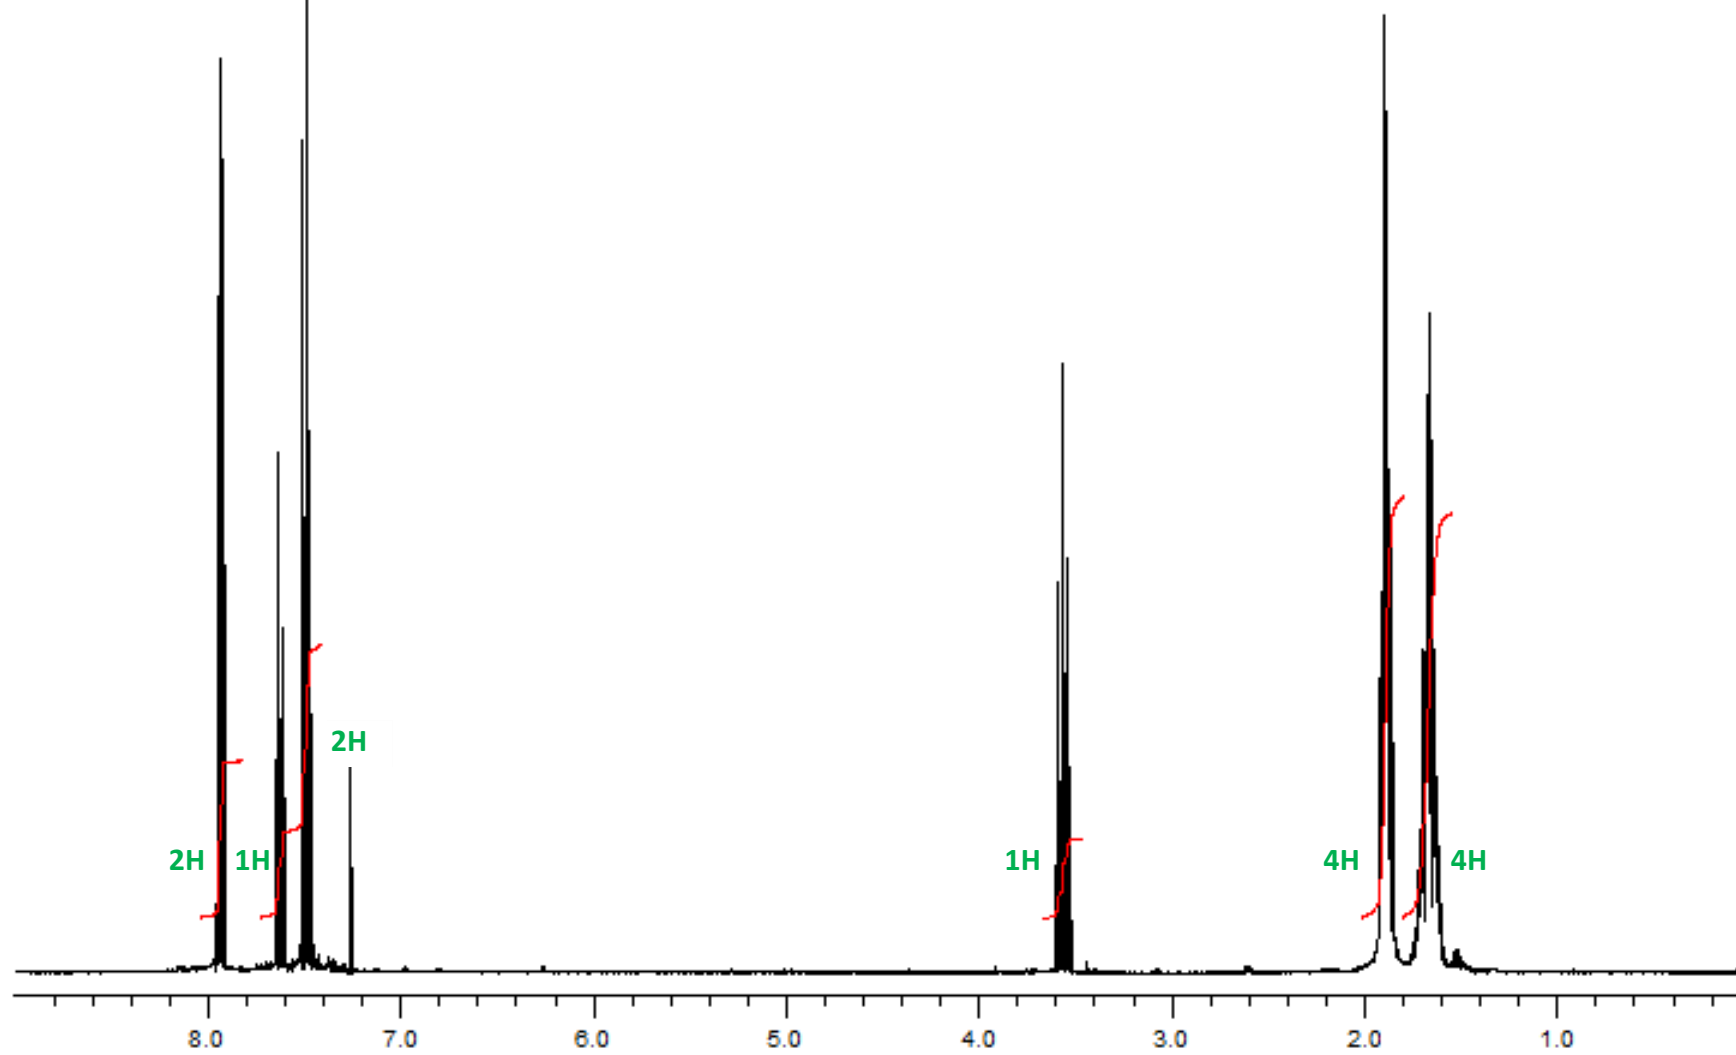

<sup>13</sup>C NMR - Compound **5ka**.

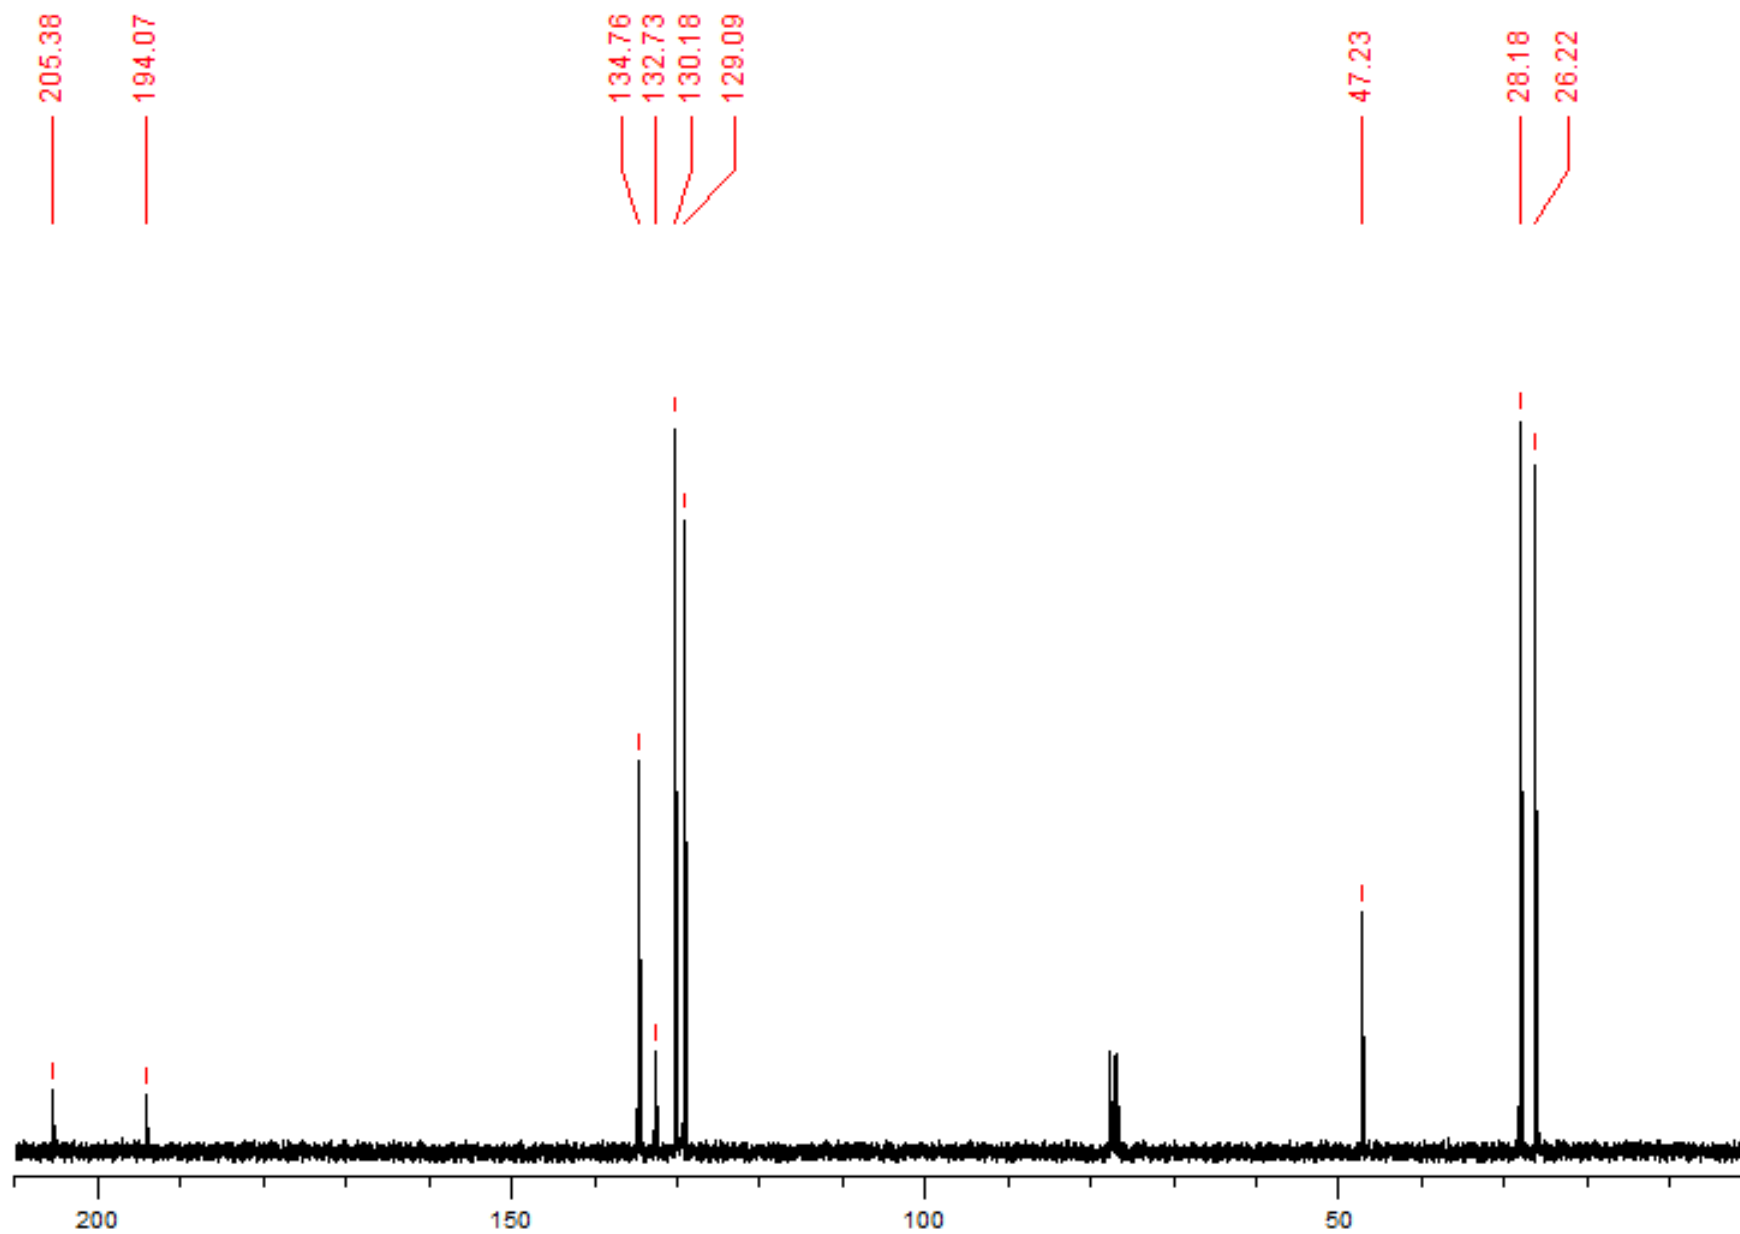

Supplement: c5ra03772g1.pdf [file c5ra03772g1.pdf]
